# Supplementary material for: Synthesis of 3-[(coumarinyl)carbonyl]-3a,8b-dihyroindeno[1,2-b]pyrrole-4(1H)-ones and their conversion to coumarin bearing spiro[isobenzofuran-1,2′-pyrrole] moiety compounds via oxidative cleavage reaction
Source: Royal Society of Chemistry journal article supplement (doi:10.1039/c5ra15405g), 2015-01-01

## Supporting Information

### Synthesis of 3-[(Coumarinyl)carbonyl]-3a,8b-dihydroindeno[1,2-b]pyrrole-4(1*H*)-ones and Their Conversion to Coumarin Bearing Spiro[isobenzofuran-1,2'-pyrrole] Moiety compounds *via* Oxidative Cleavage Reaction

Abdolali Alizadeh\*,<sup>a</sup> Rashid Ghanbaripour<sup>a</sup> Masoumeh Feizabadi<sup>a</sup> Long-Guan Zhu<sup>b</sup> and Michal Dusek<sup>c</sup>

<sup>a</sup>*Department of Chemistry, Tarbiat Modares University, P.O. Box 14115-175, Tehran, Iran*

<sup>b</sup>*Department of Chemistry, Zhejiang University, Hangzhou 310027, PR China*

<sup>c</sup>*Institute of Physics ASCR, Na Slovance 2, 182 21 Prague, Czech Republic*

[aalizadeh@modares.ac.ir](mailto:aalizadeh@modares.ac.ir)

#### The Table of Contents

|                                                                               |         |
|-------------------------------------------------------------------------------|---------|
| Title, author's name, address and table of contents                           | S1      |
| <sup>1</sup> H and <sup>13</sup> C NMR spectrums of <b>3a-g</b>               | S2-S22  |
| <sup>1</sup> H and <sup>13</sup> C NMR spectrums of <b>4a</b> and <b>5a</b>   | S23-S28 |
| <sup>1</sup> H and <sup>13</sup> C NMR spectrums of <b>7a-c</b> and <b>7f</b> | S29-S36 |
| Ortep diagram of <b>3a</b>                                                    | S37     |
| Ortep diagram of <b>7a</b>                                                    | S38     |

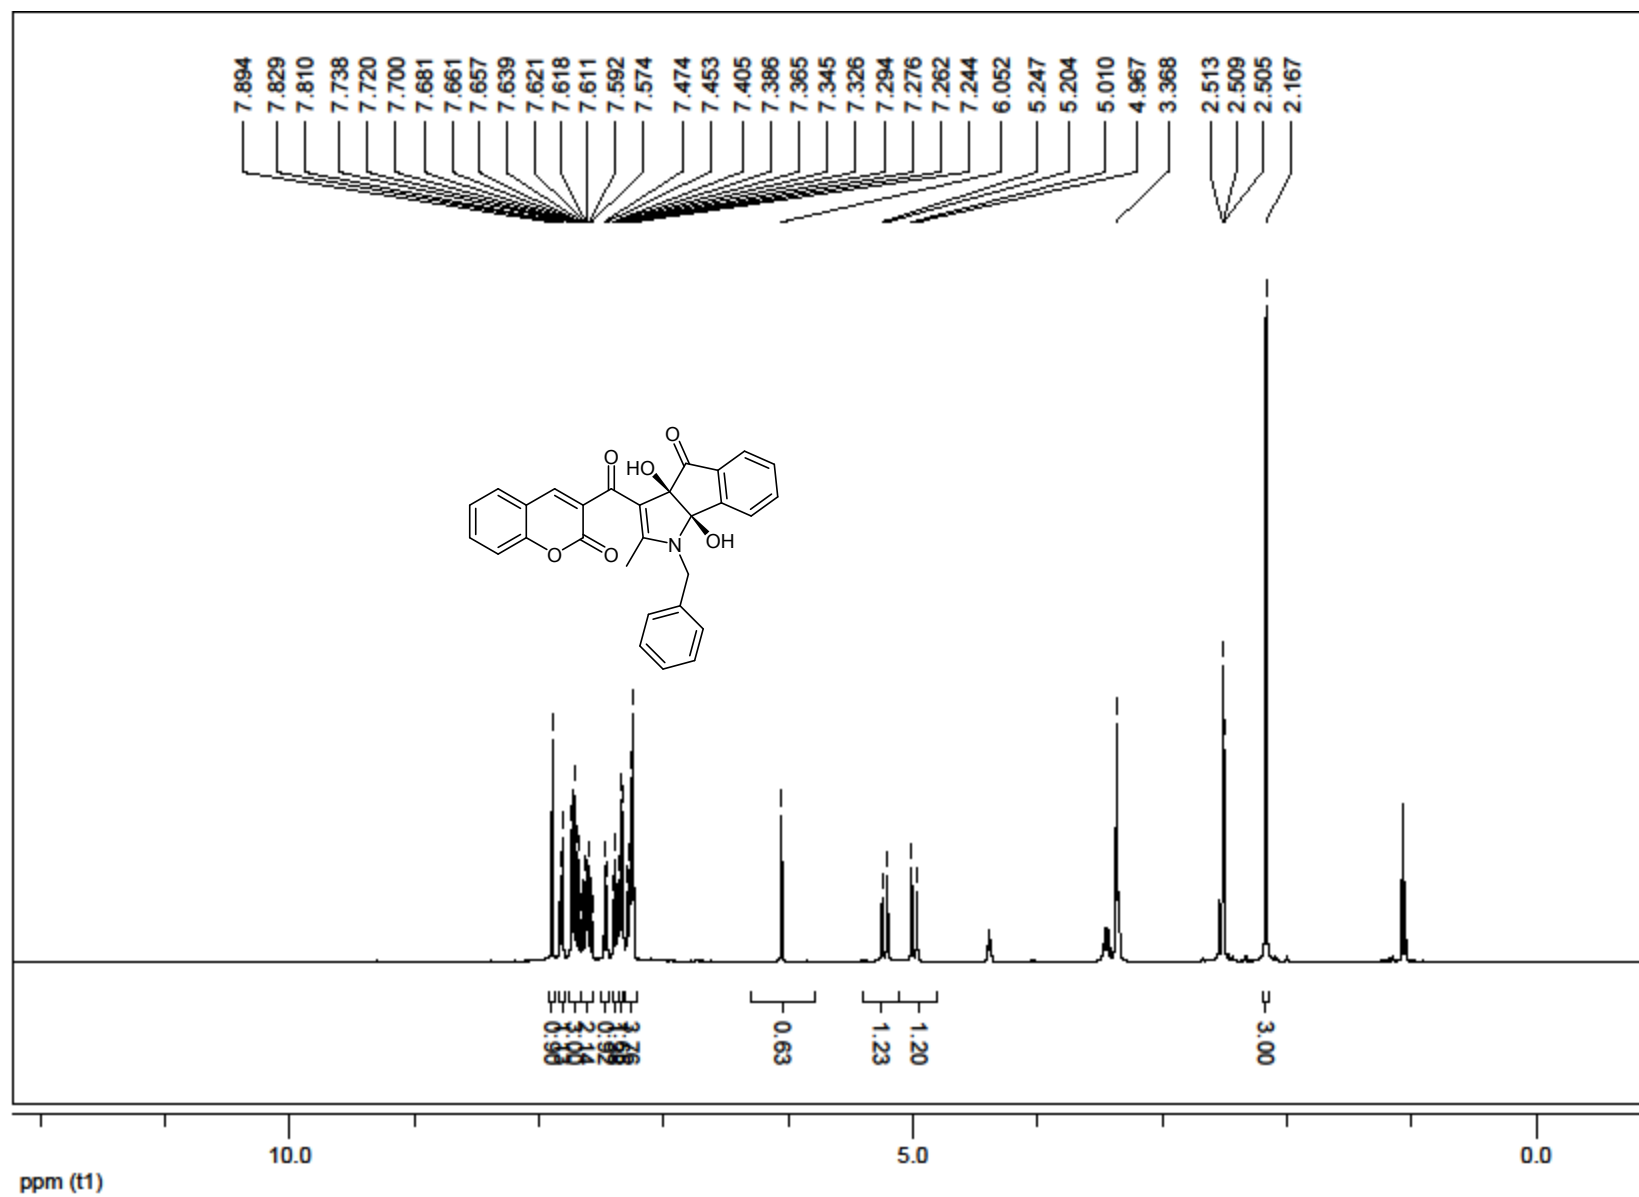

**<sup>1</sup>H NMR of 3a**

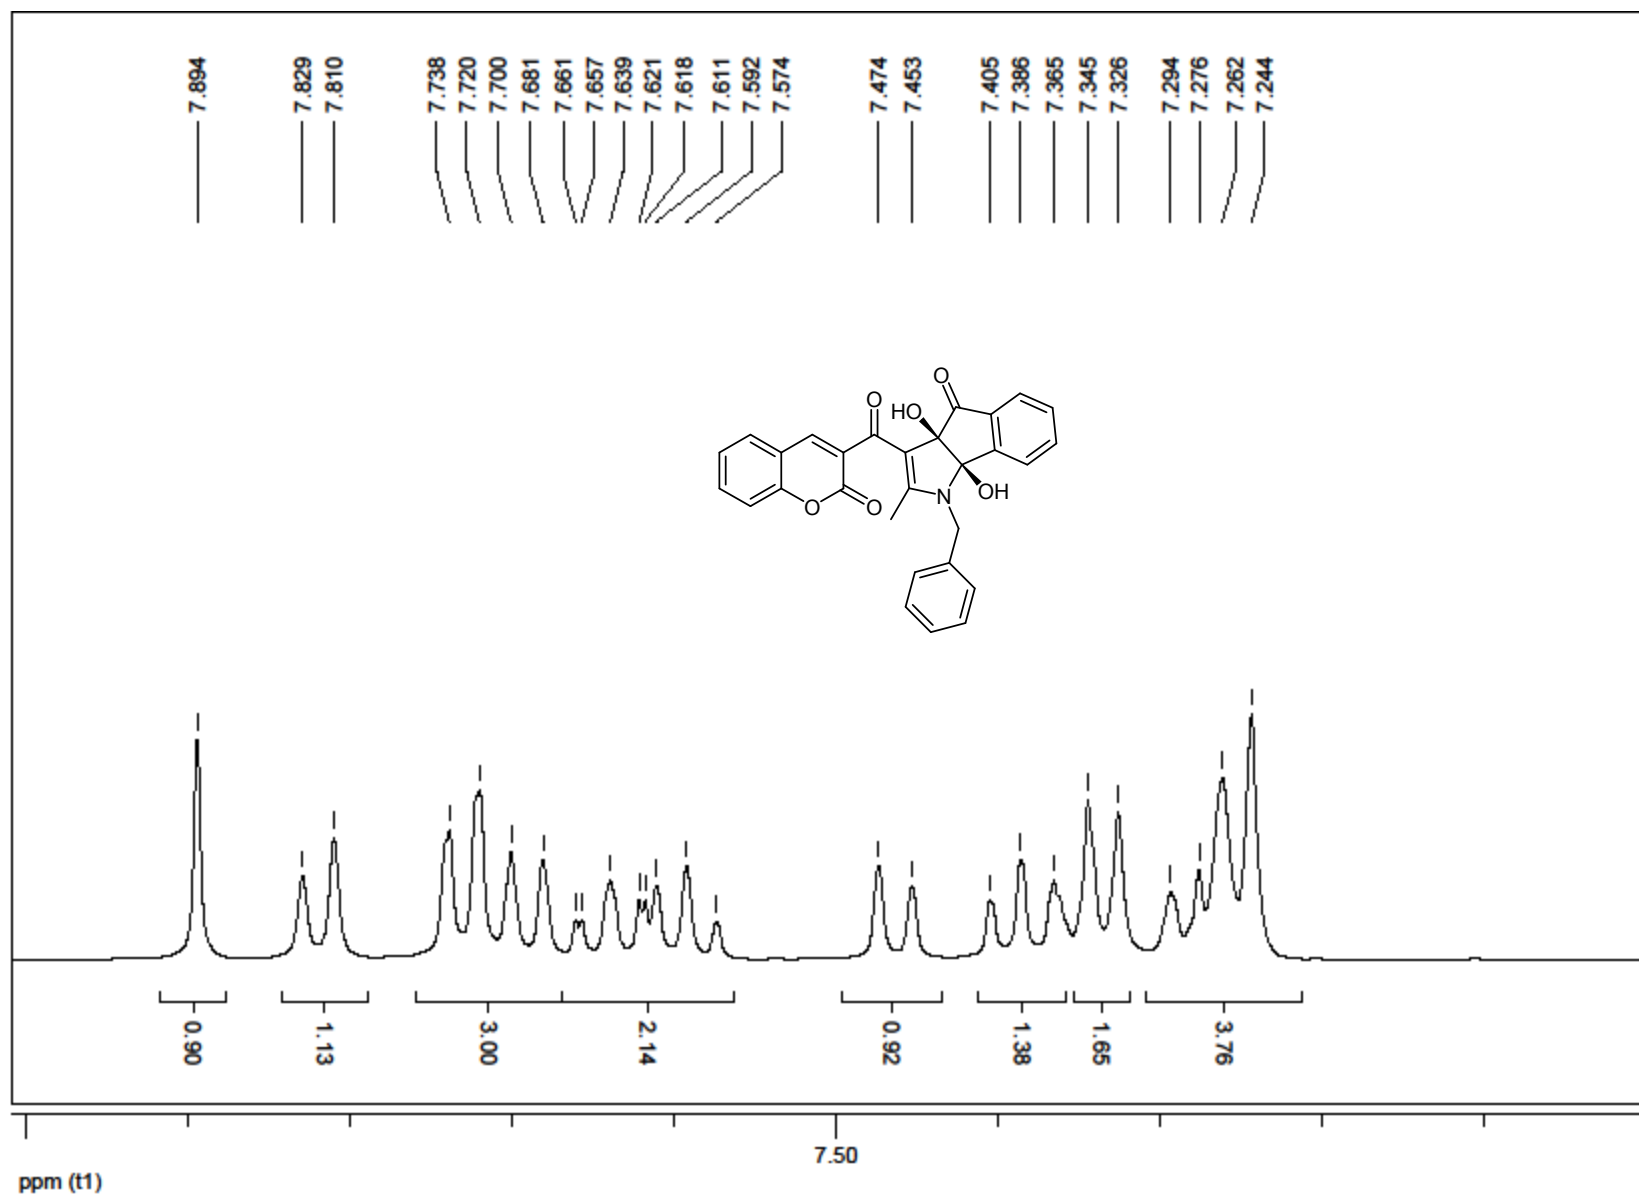

$^1\text{H}$  NMR of 3a (expand)

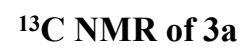

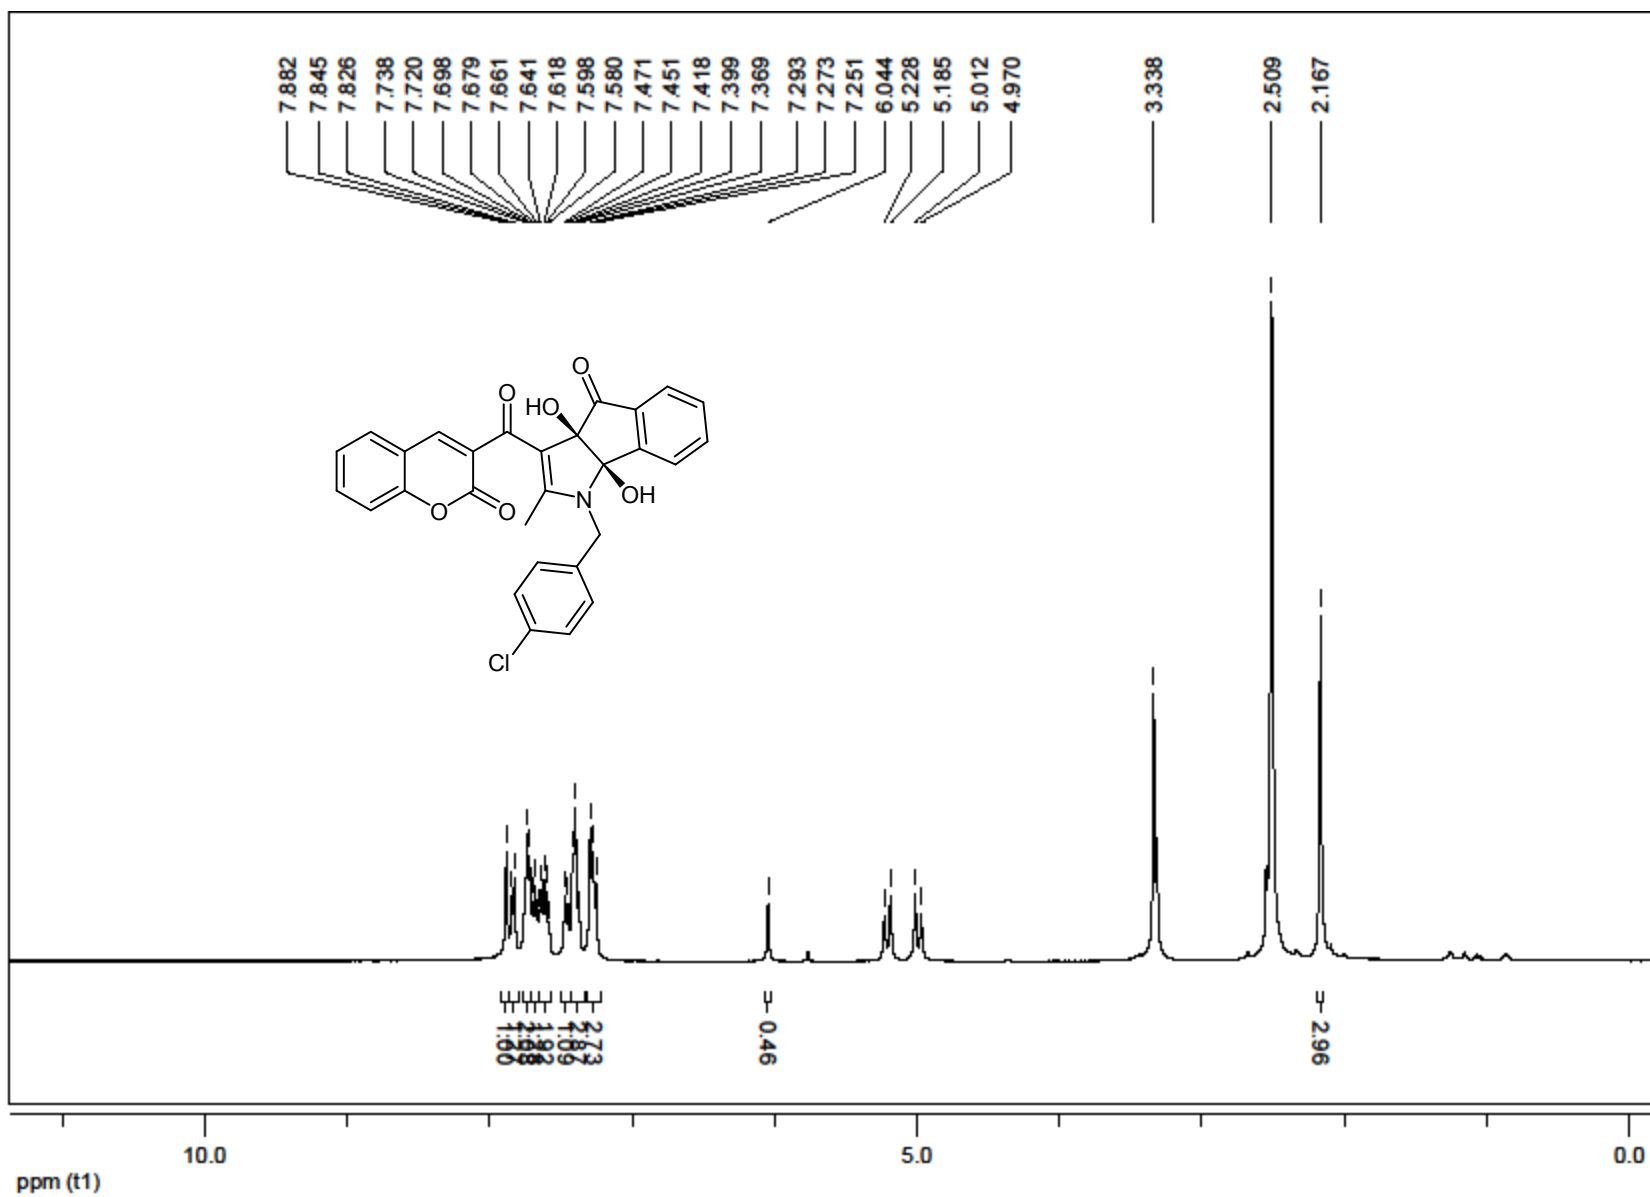

**<sup>1</sup>H NMR of 3b**

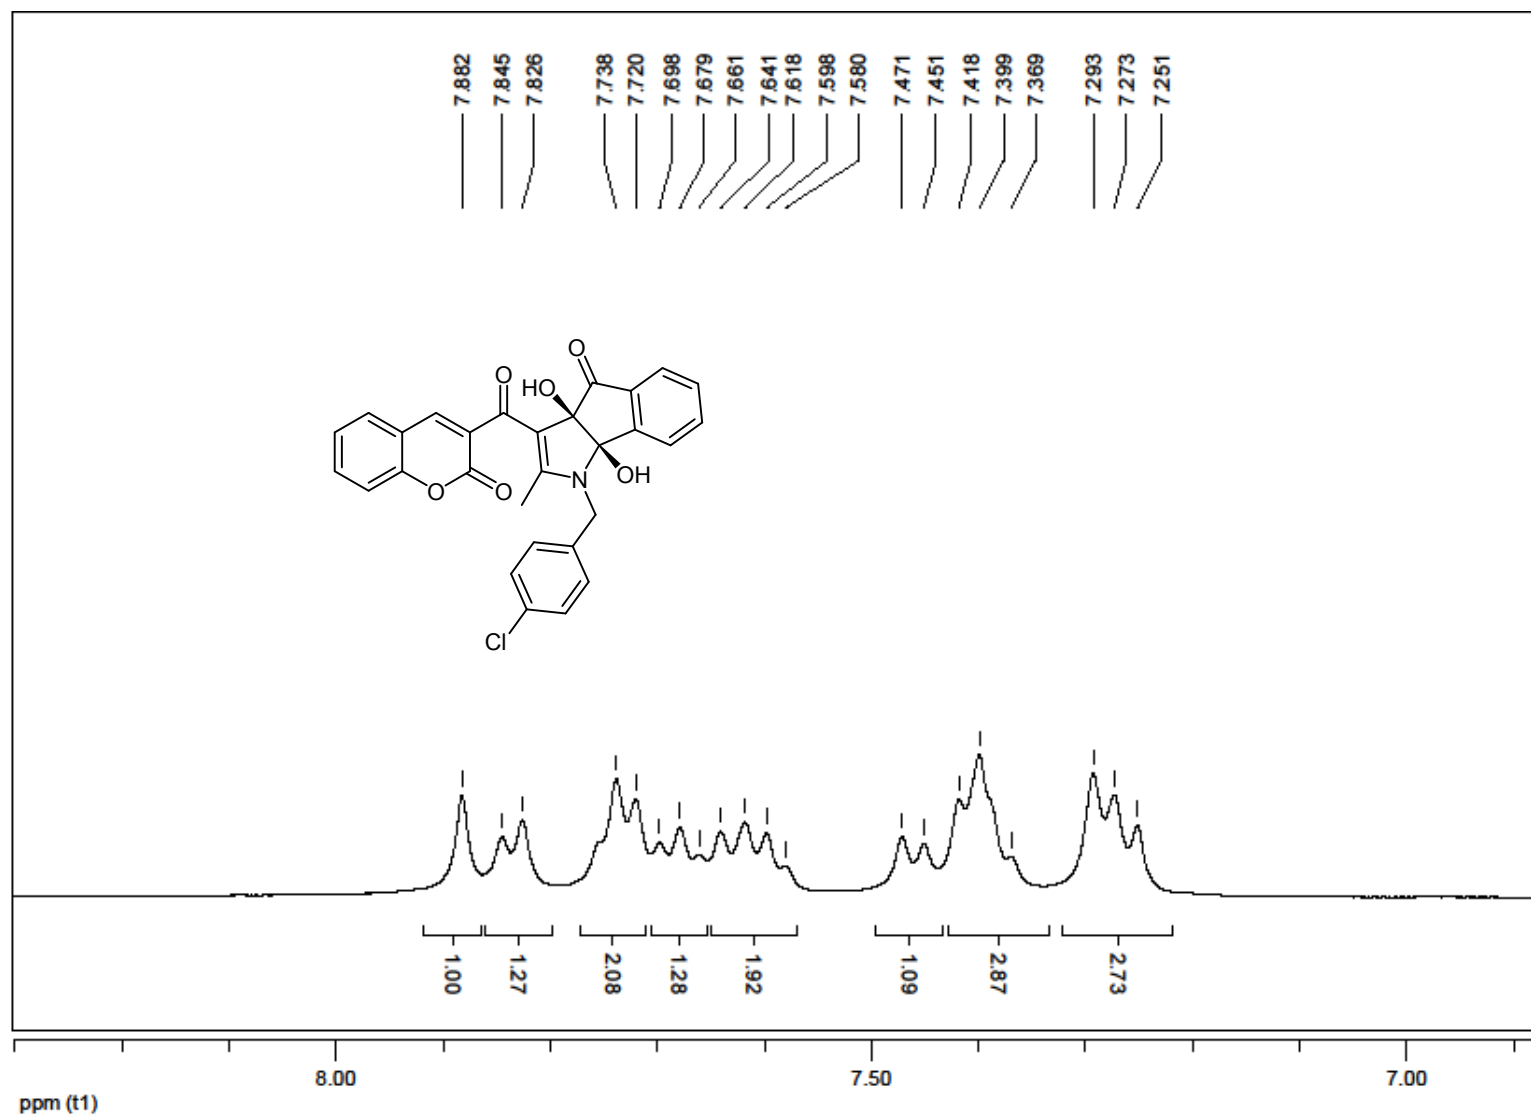

<sup>1</sup>H NMR of 3b (expand)

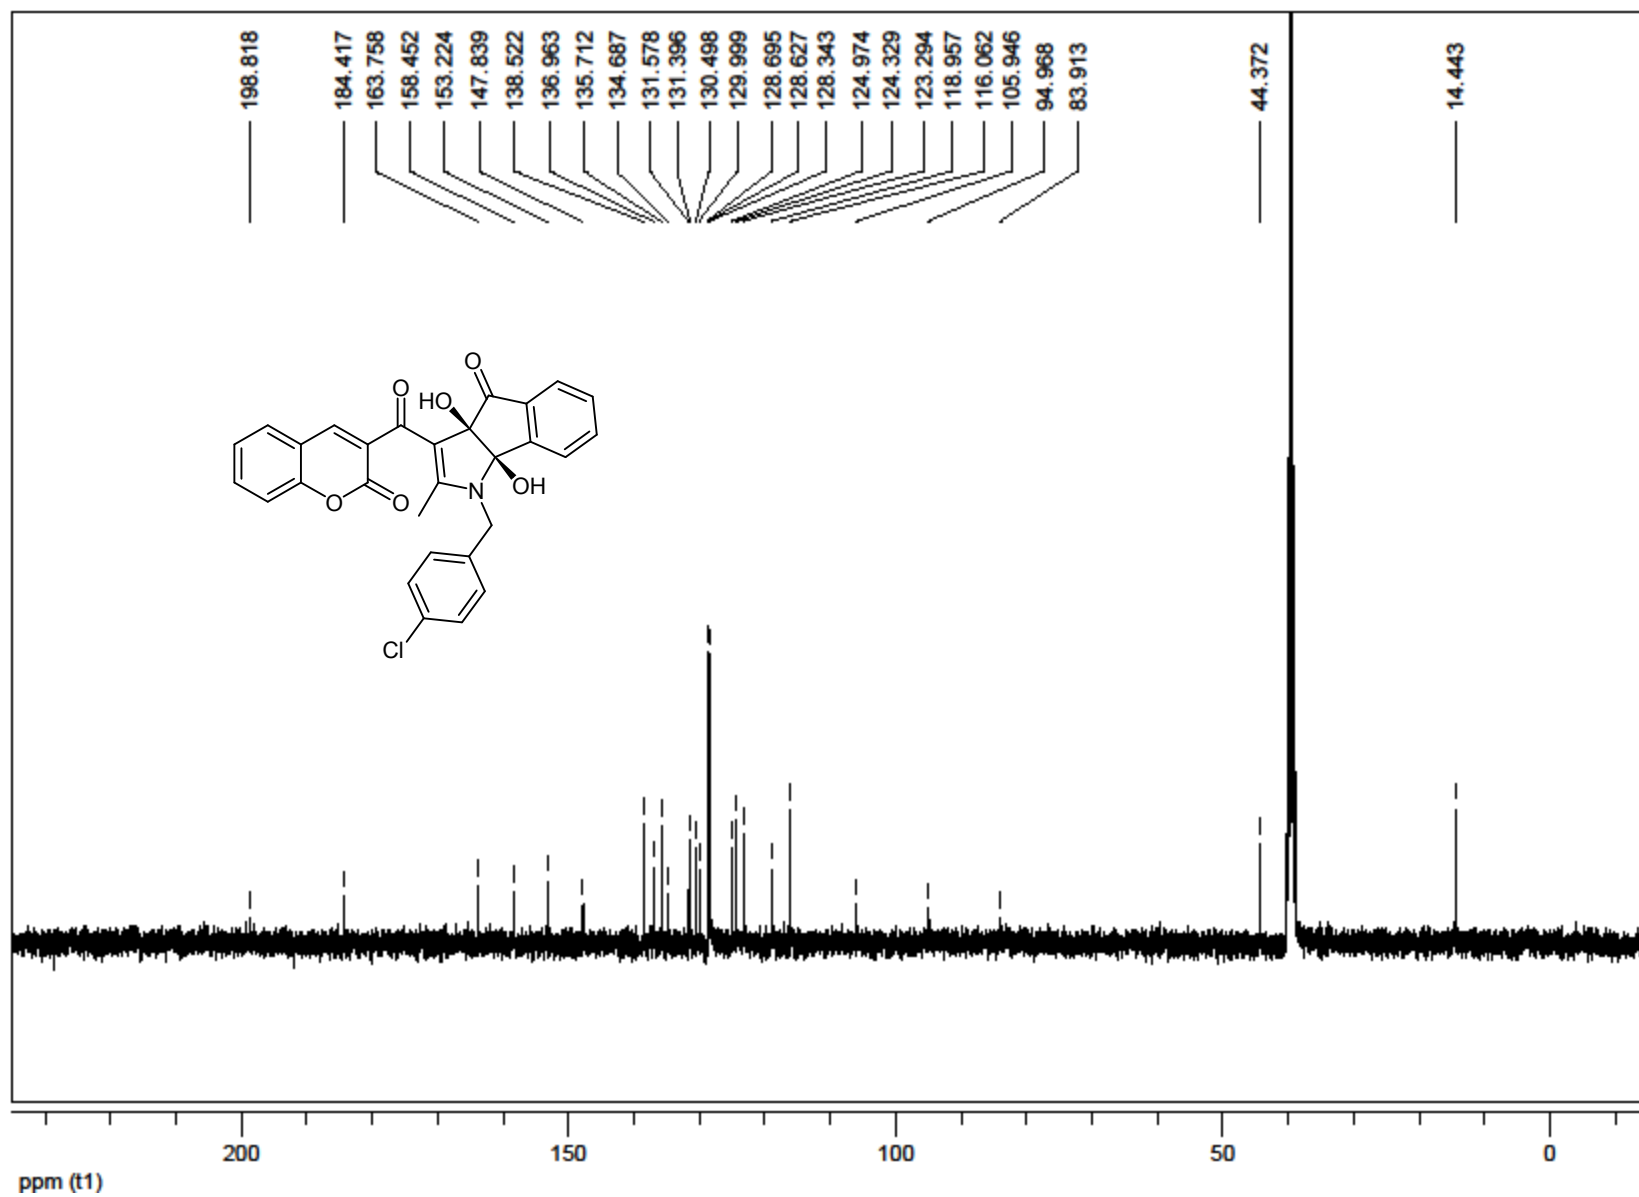

$^{13}\text{C}$  NMR of 3b

### <sup>1</sup>H NMR of 3c



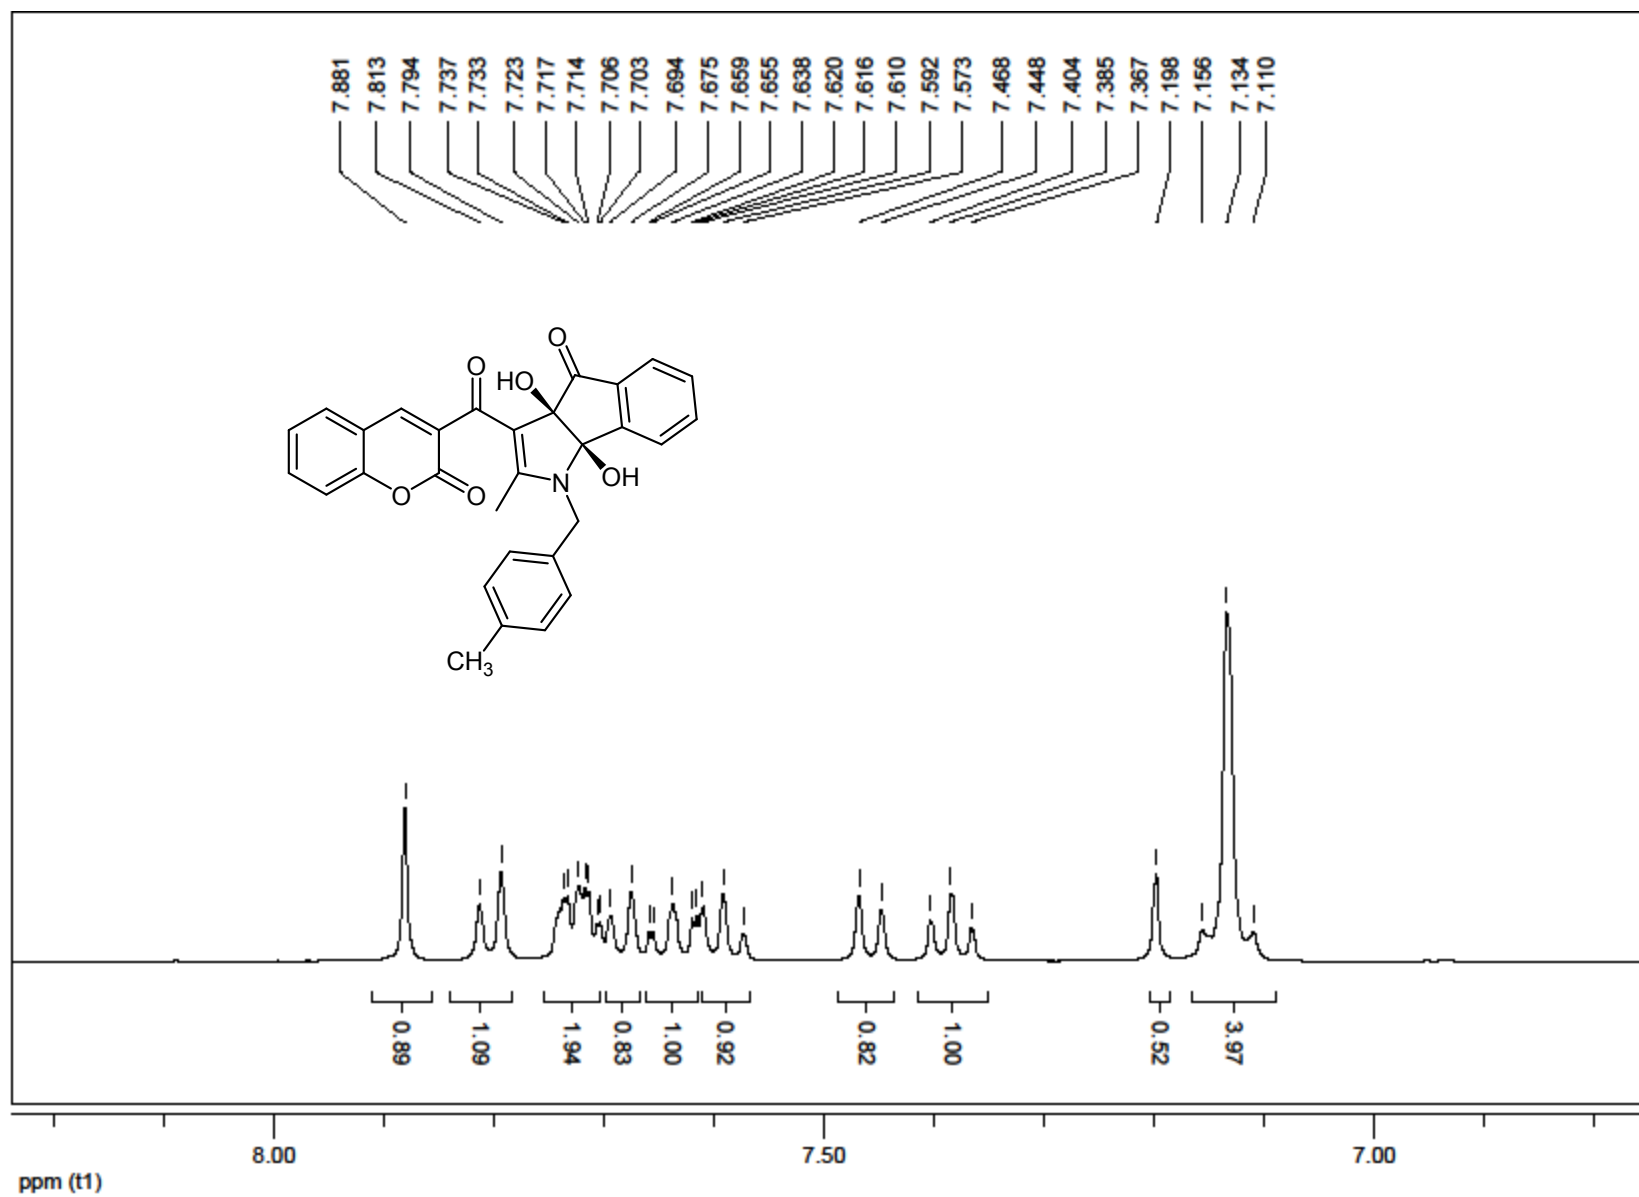

$^1\text{H}$  NMR of 3c (expand)

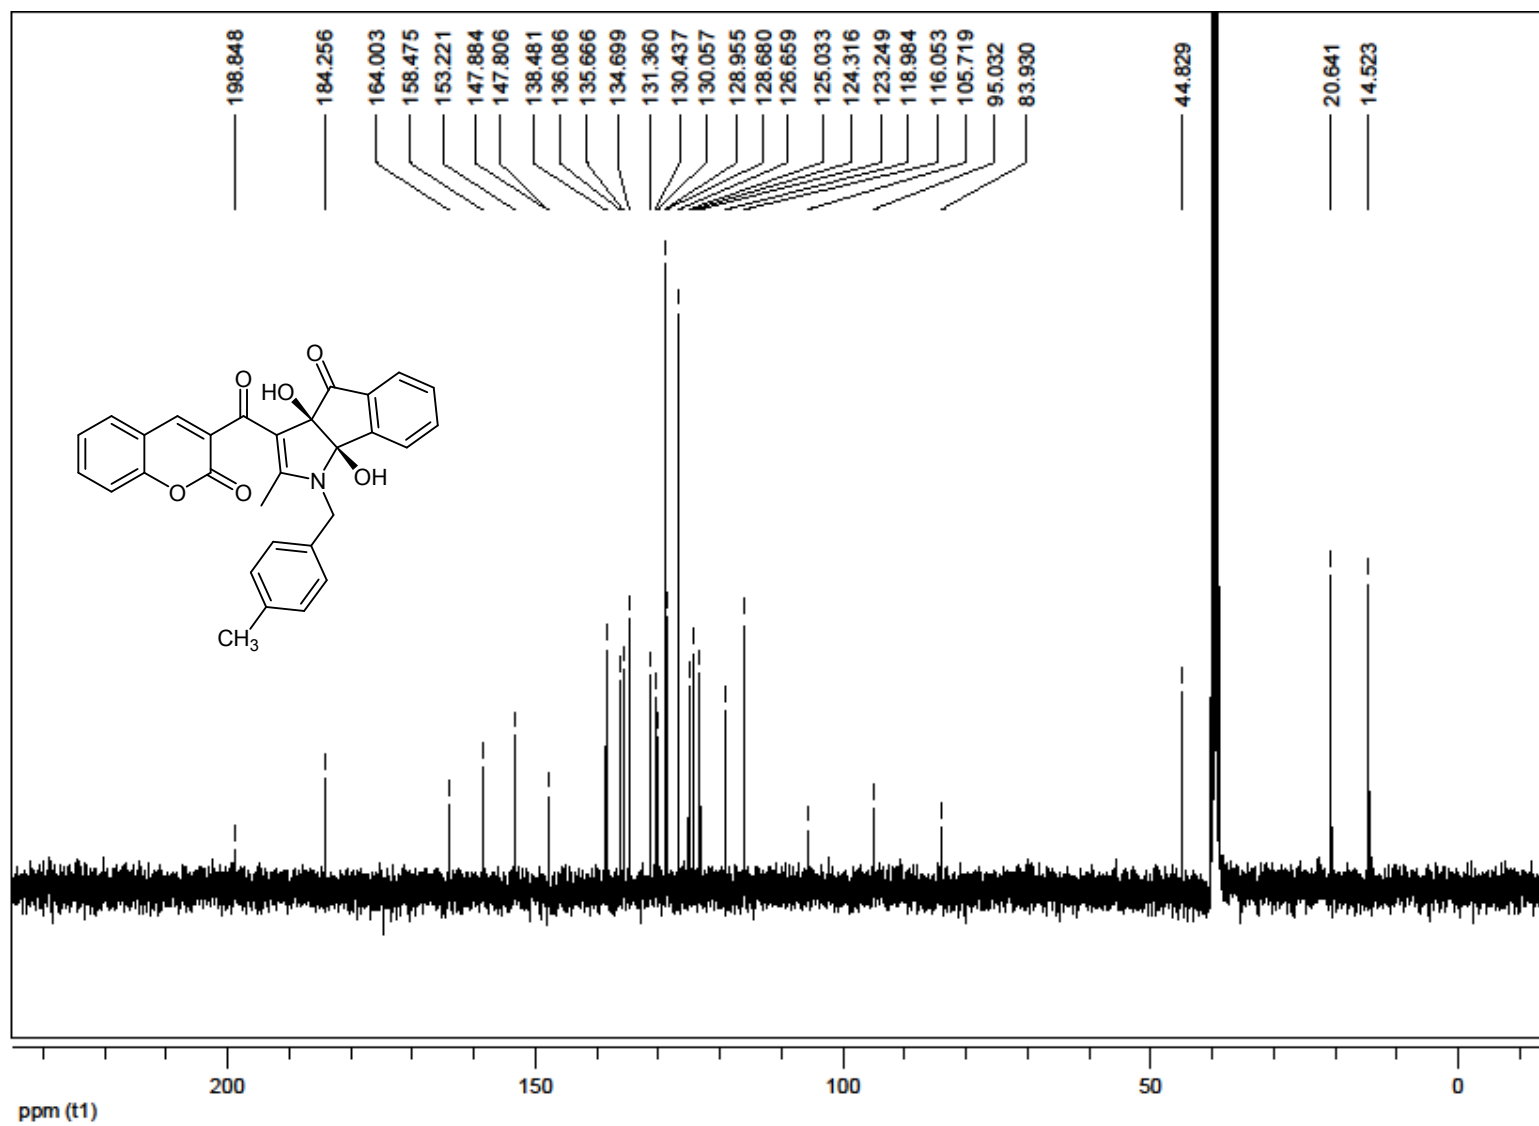

$^{13}\text{C}$  NMR of 3c

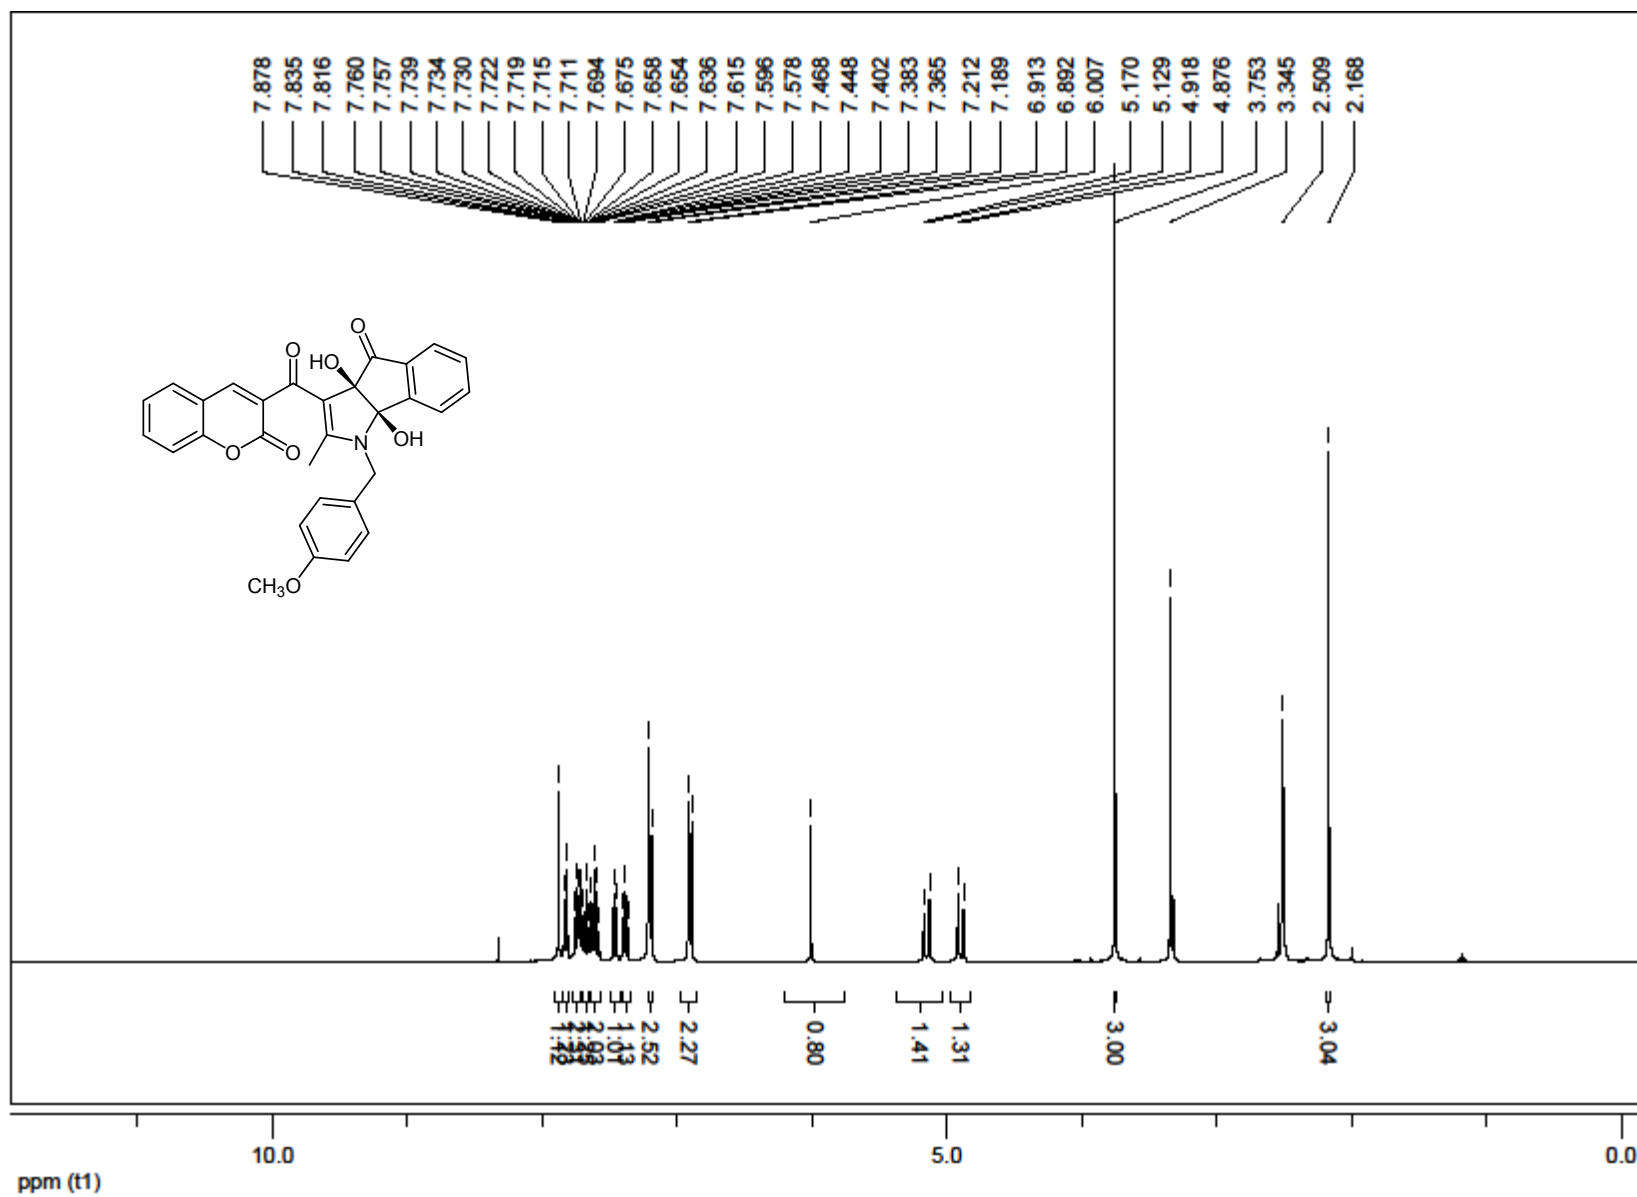

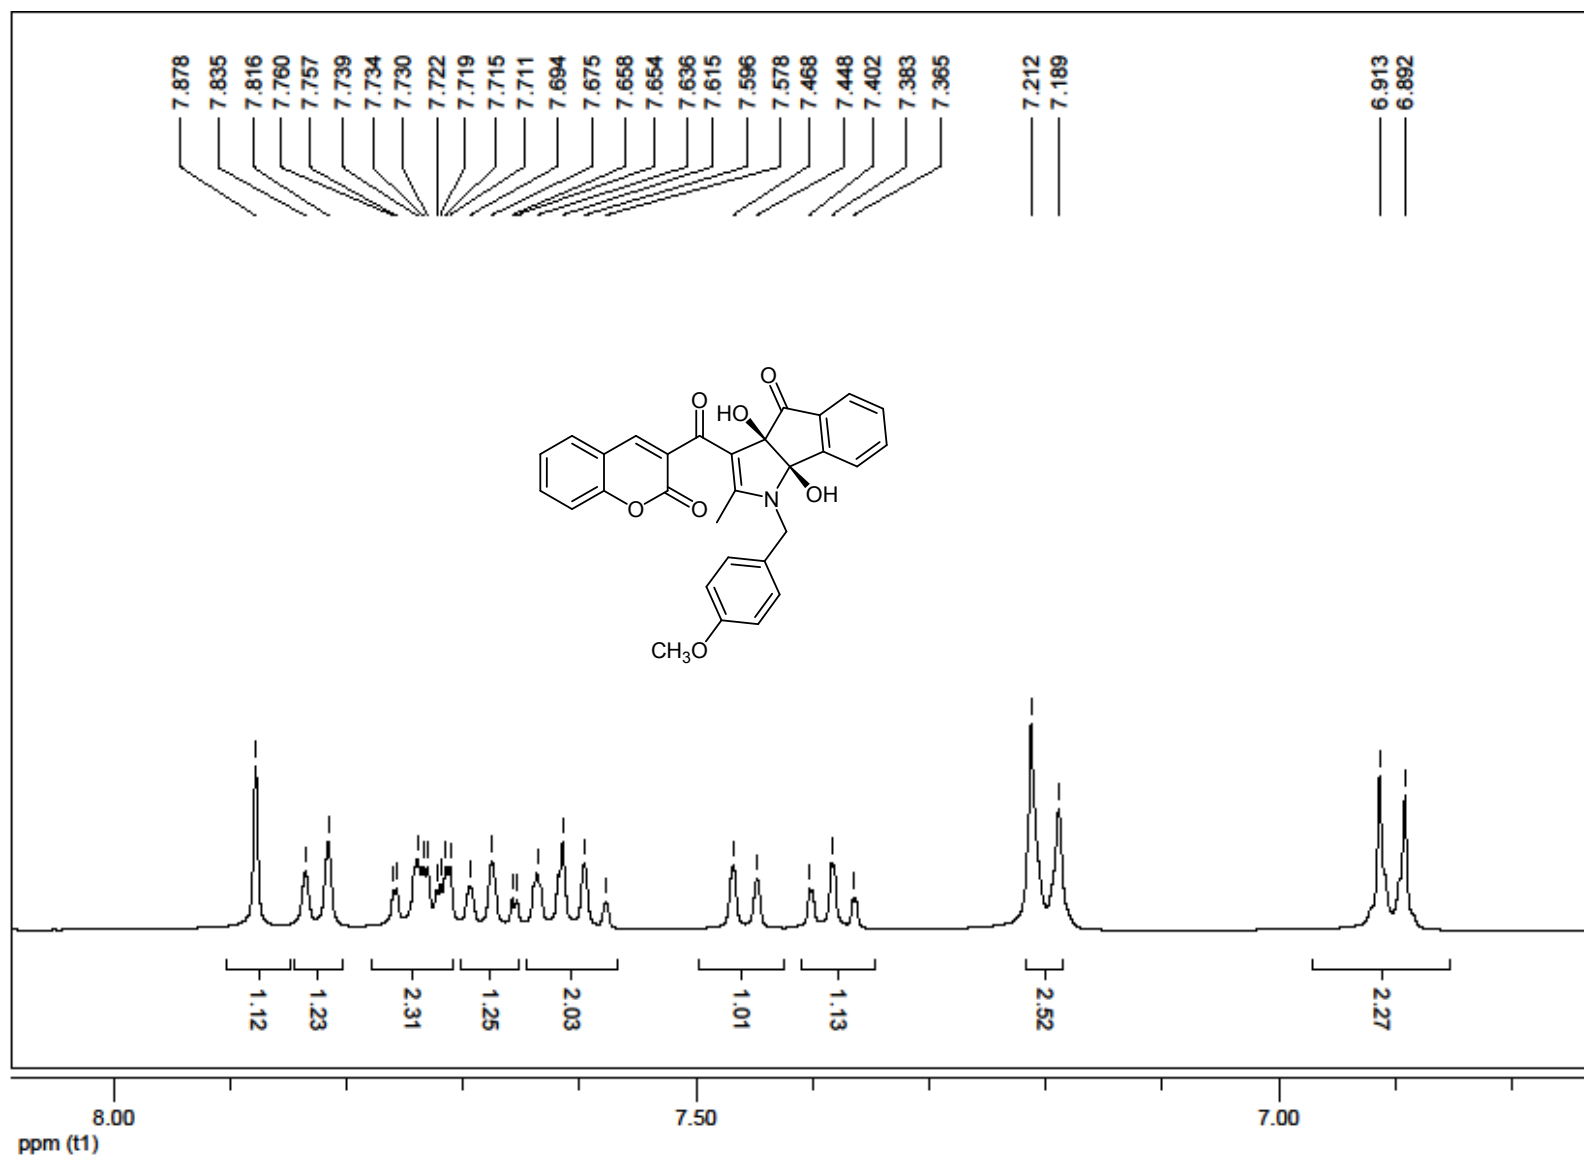

<sup>1</sup>H NMR of 3d (expand)

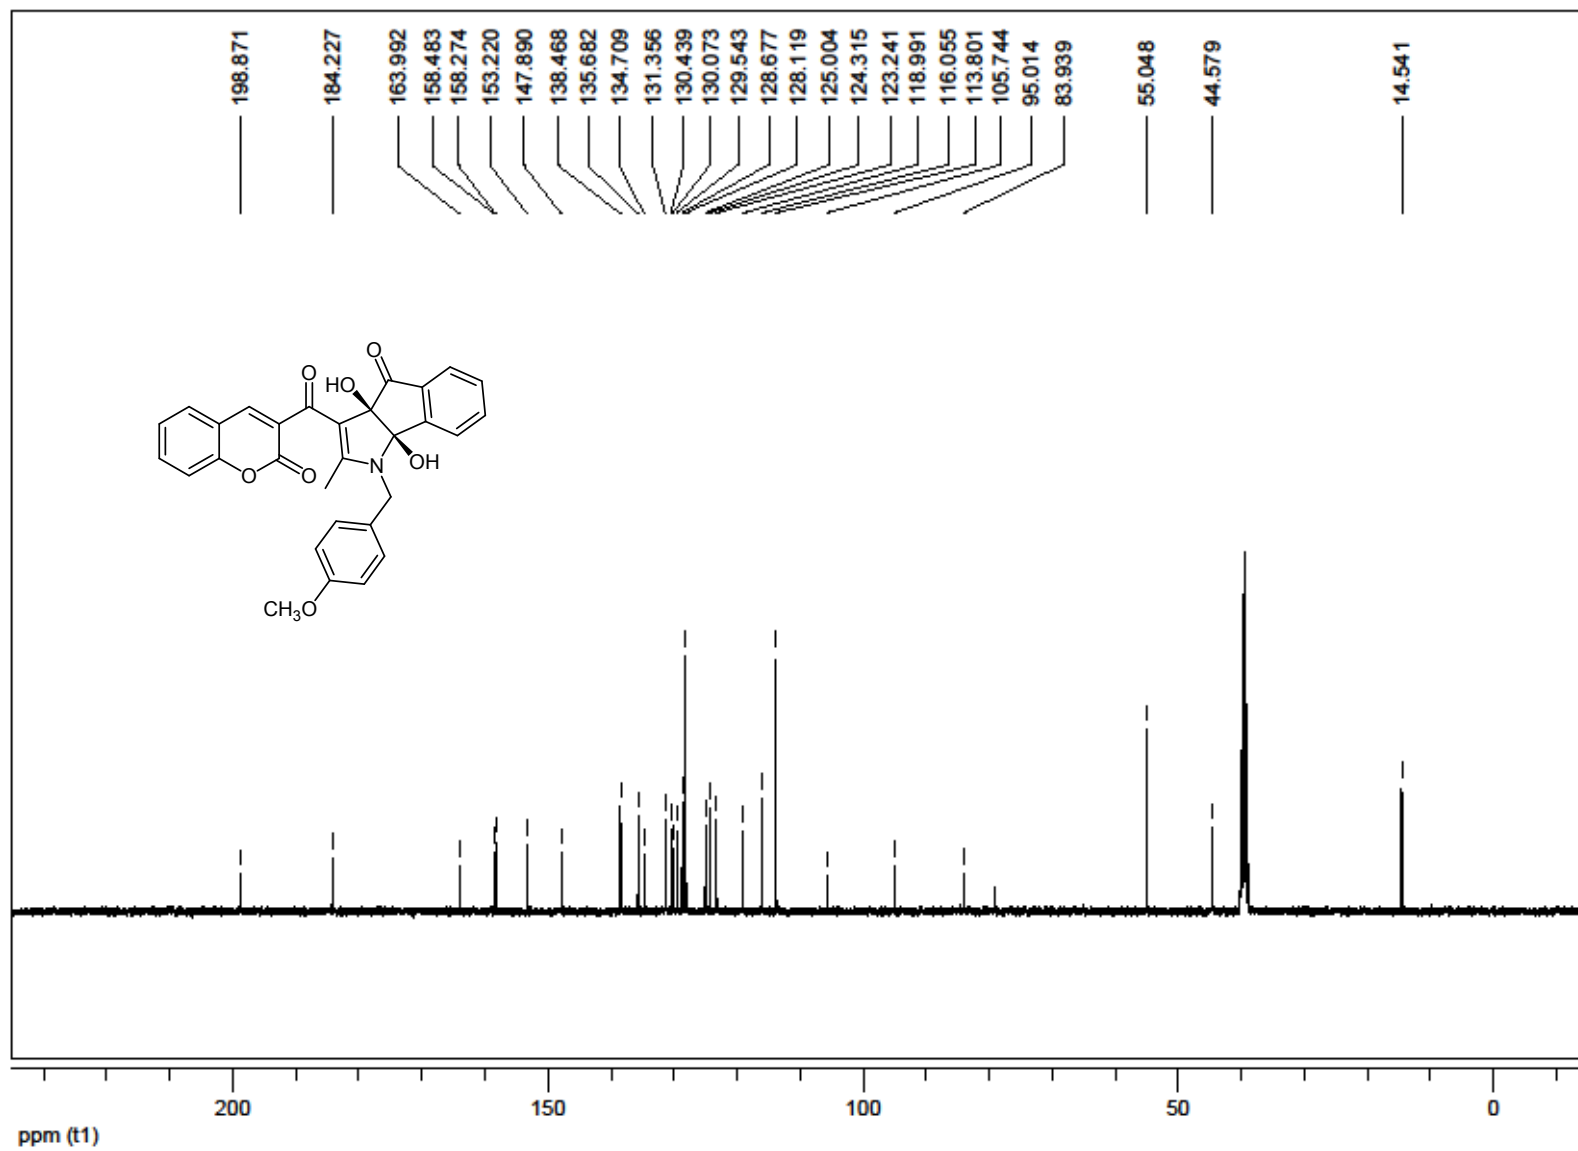

<sup>13</sup>C NMR of 3d

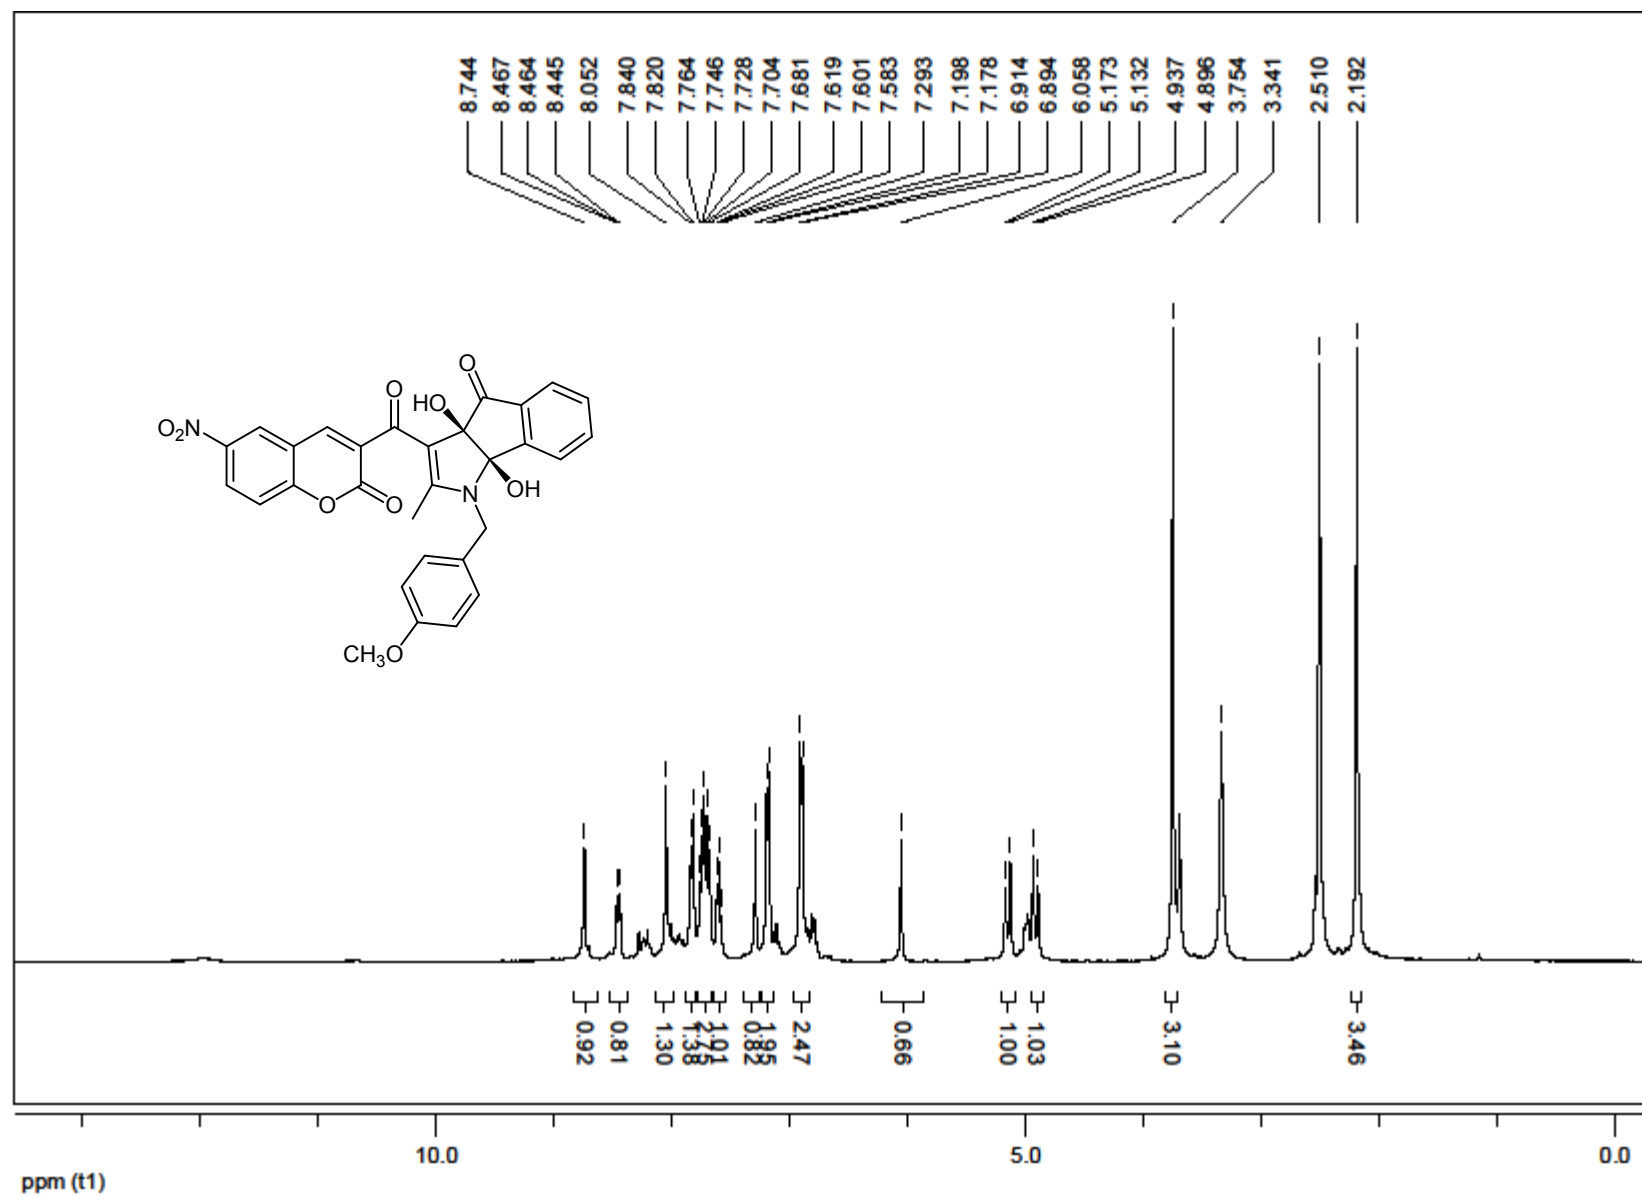

**<sup>1</sup>H NMR of 3e**

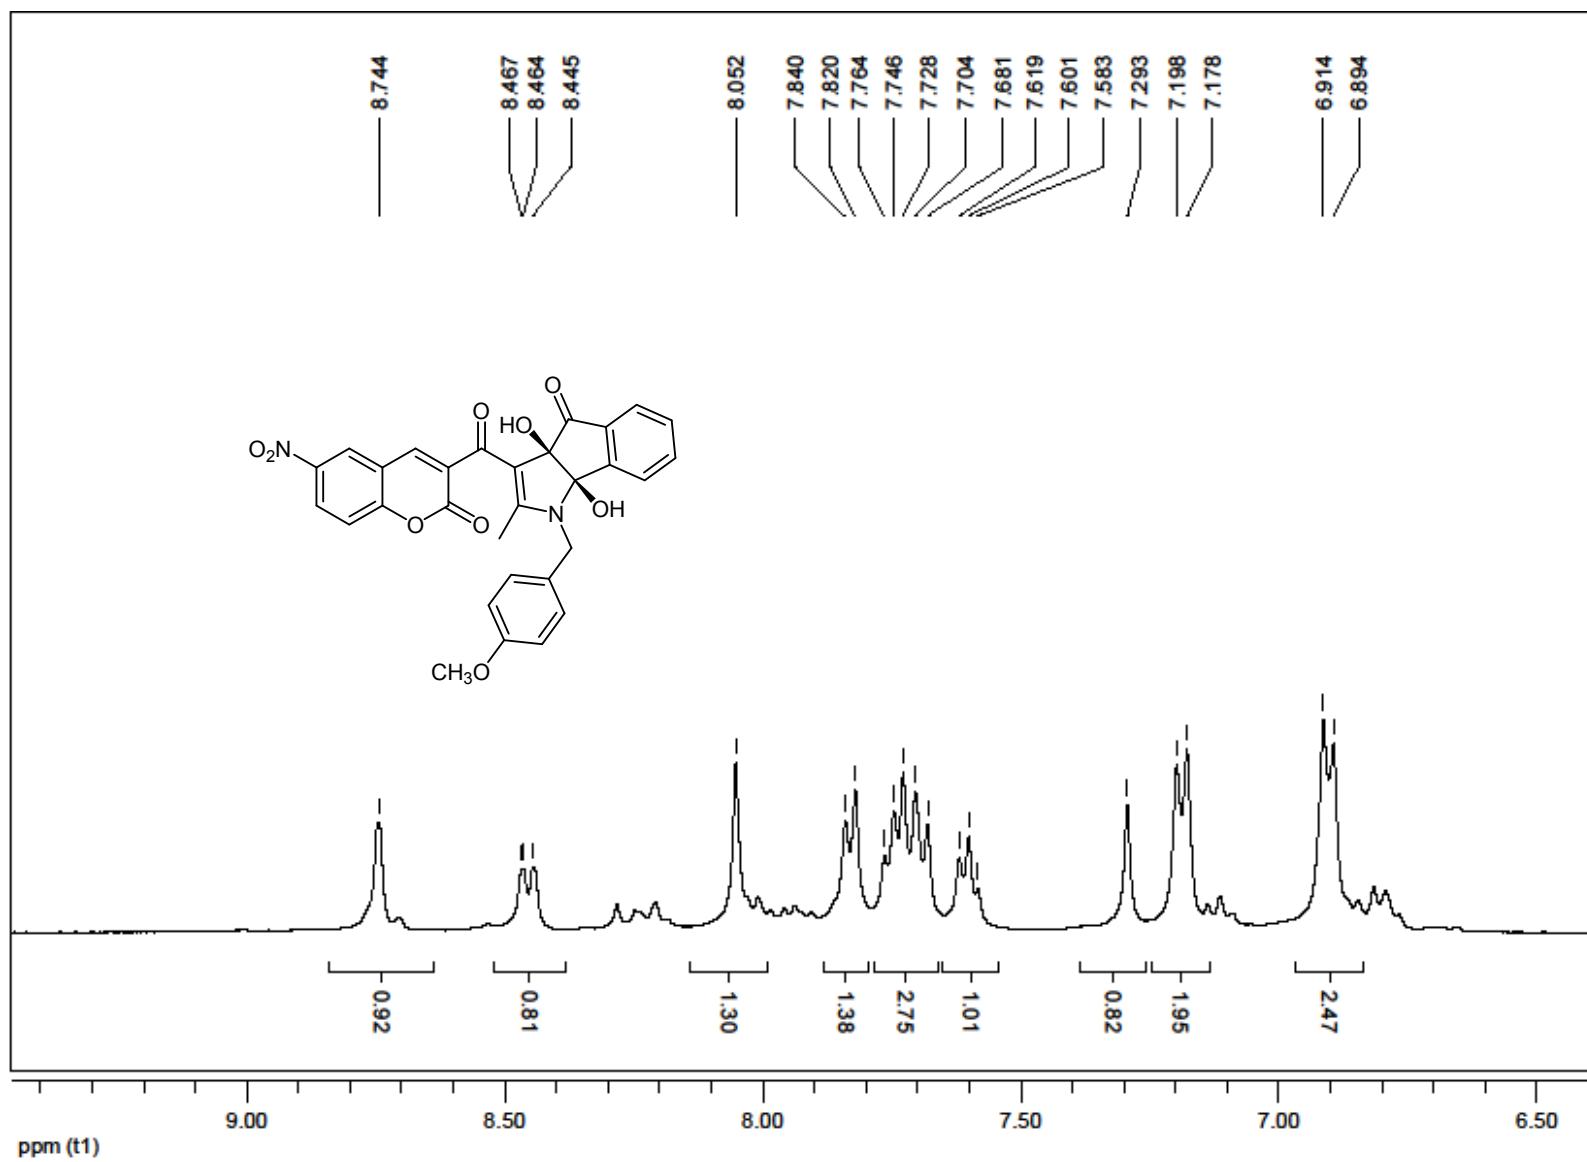

$^1\text{H}$  NMR of 3e (expand)

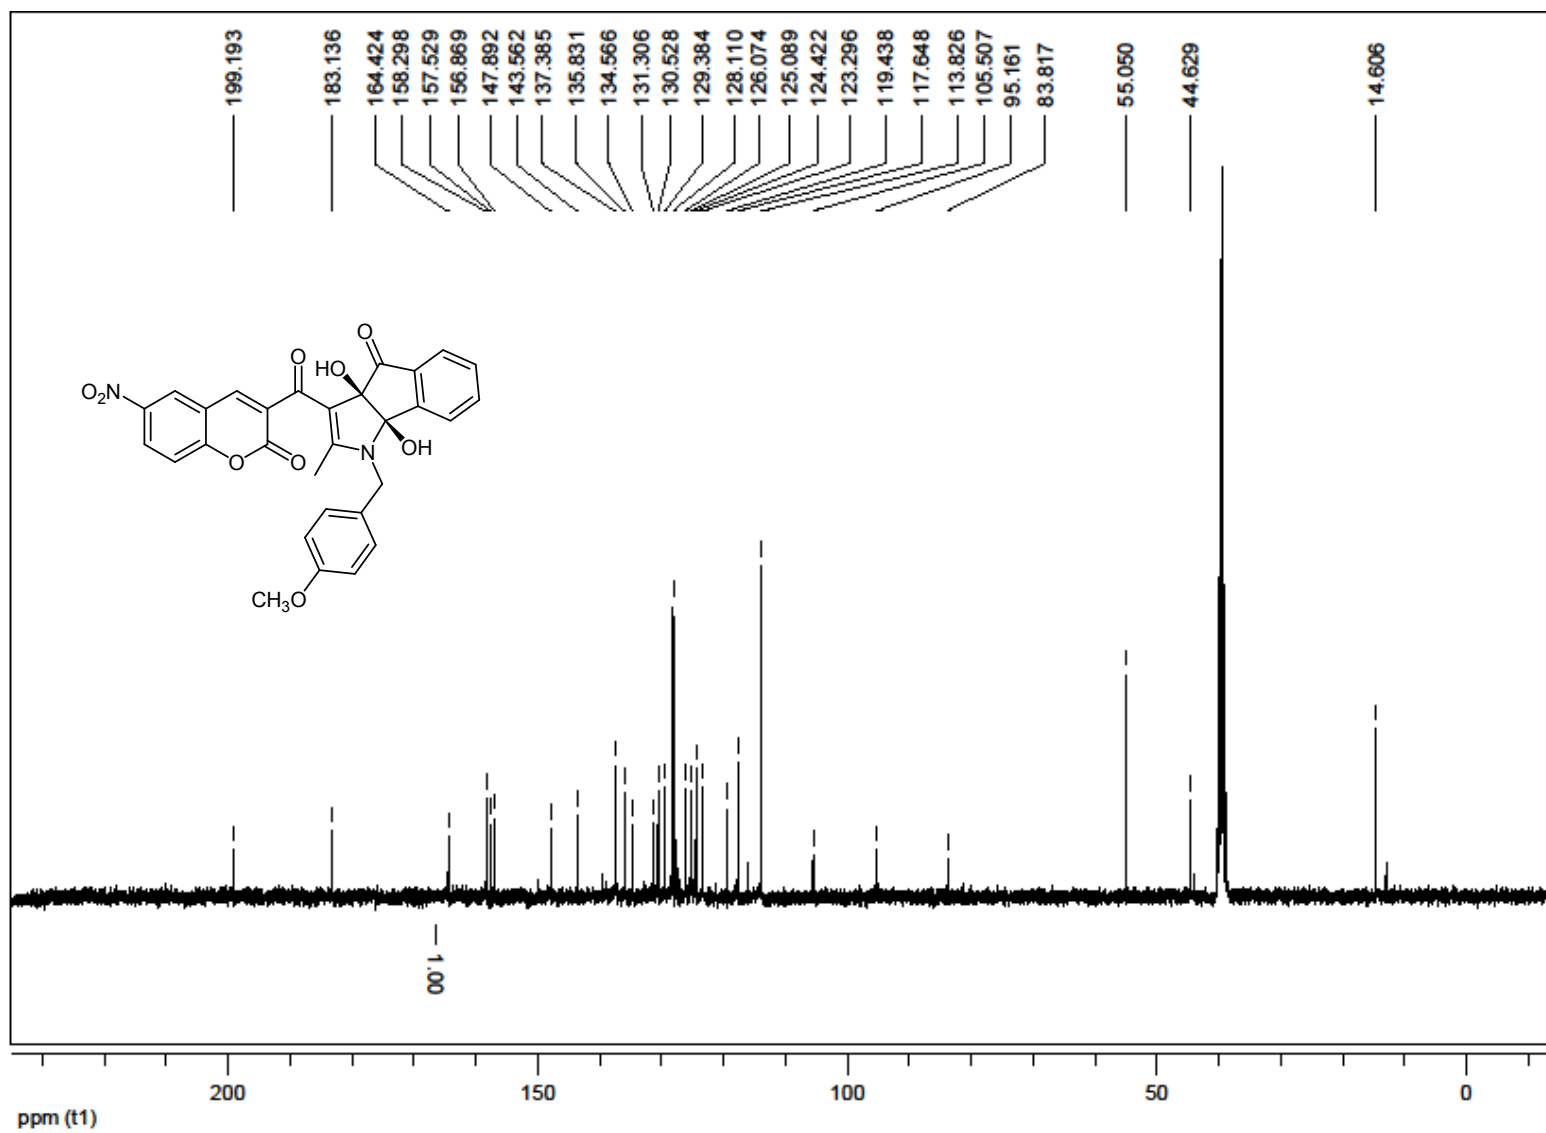

<sup>13</sup>C NMR of 3e



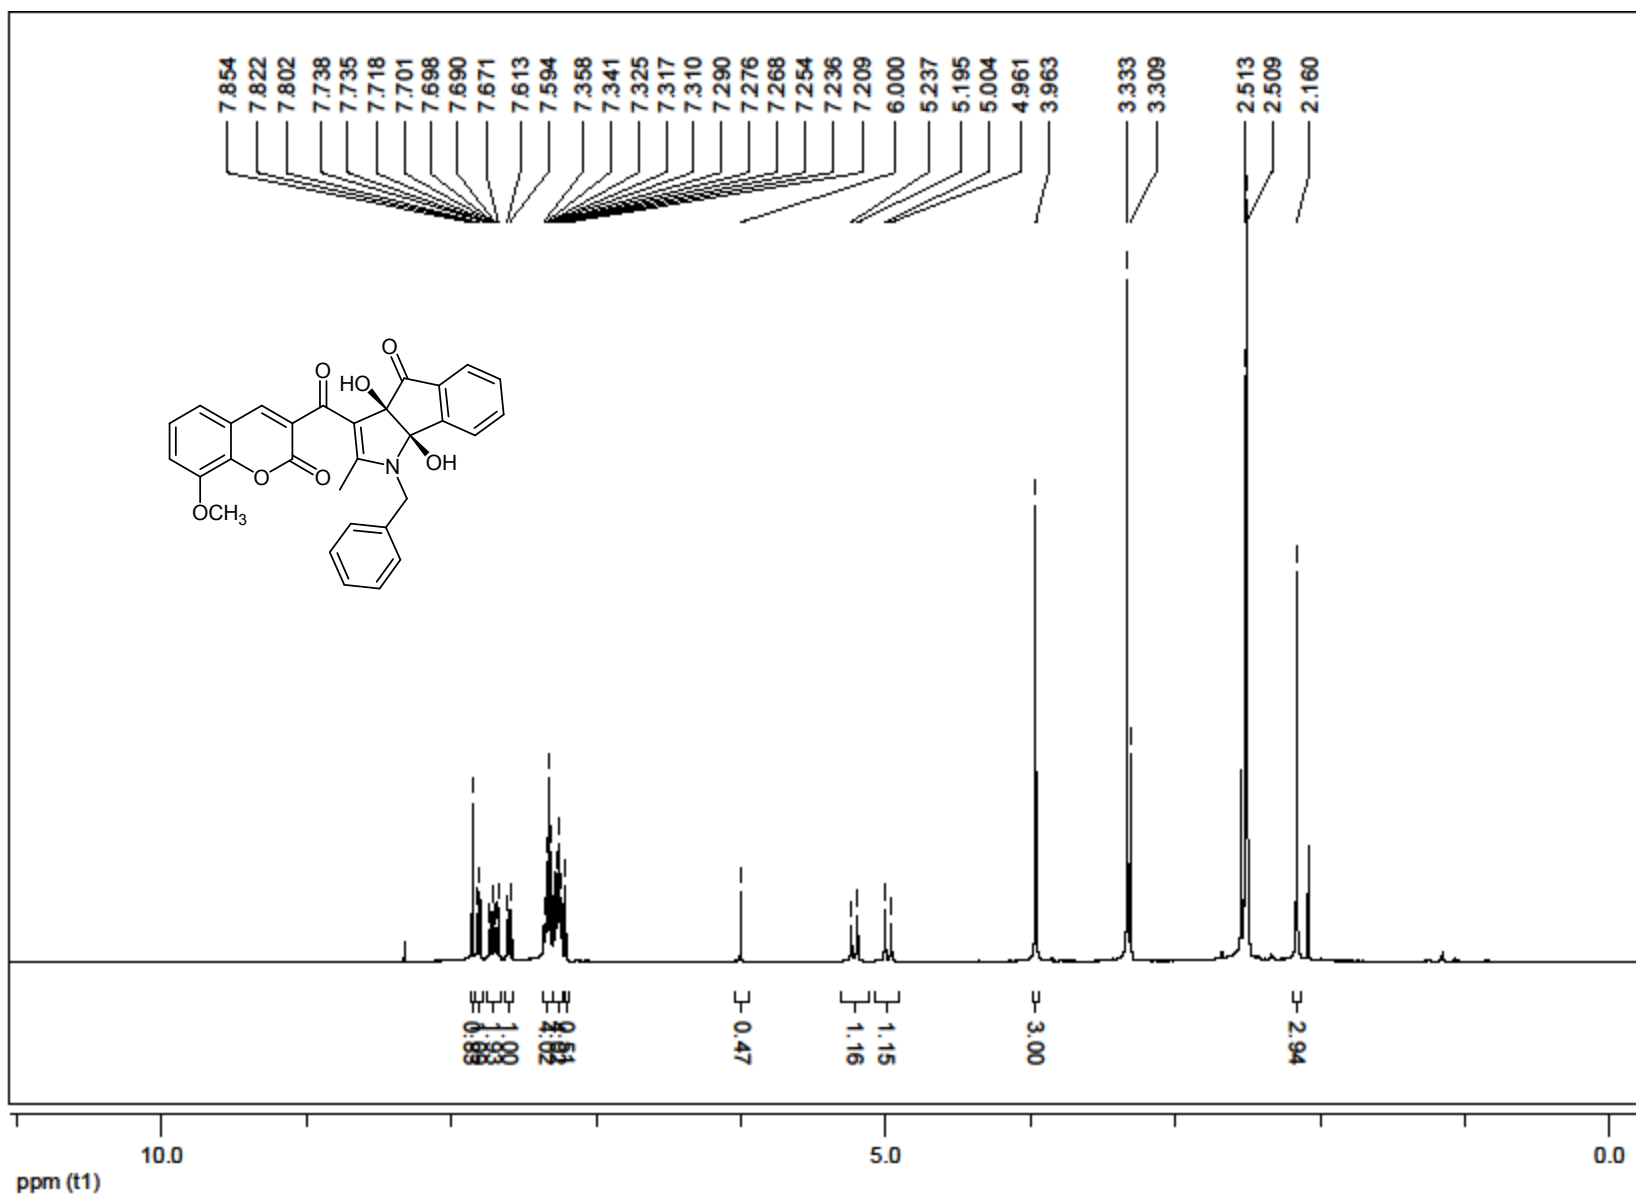

**<sup>1</sup>H NMR of 3f**

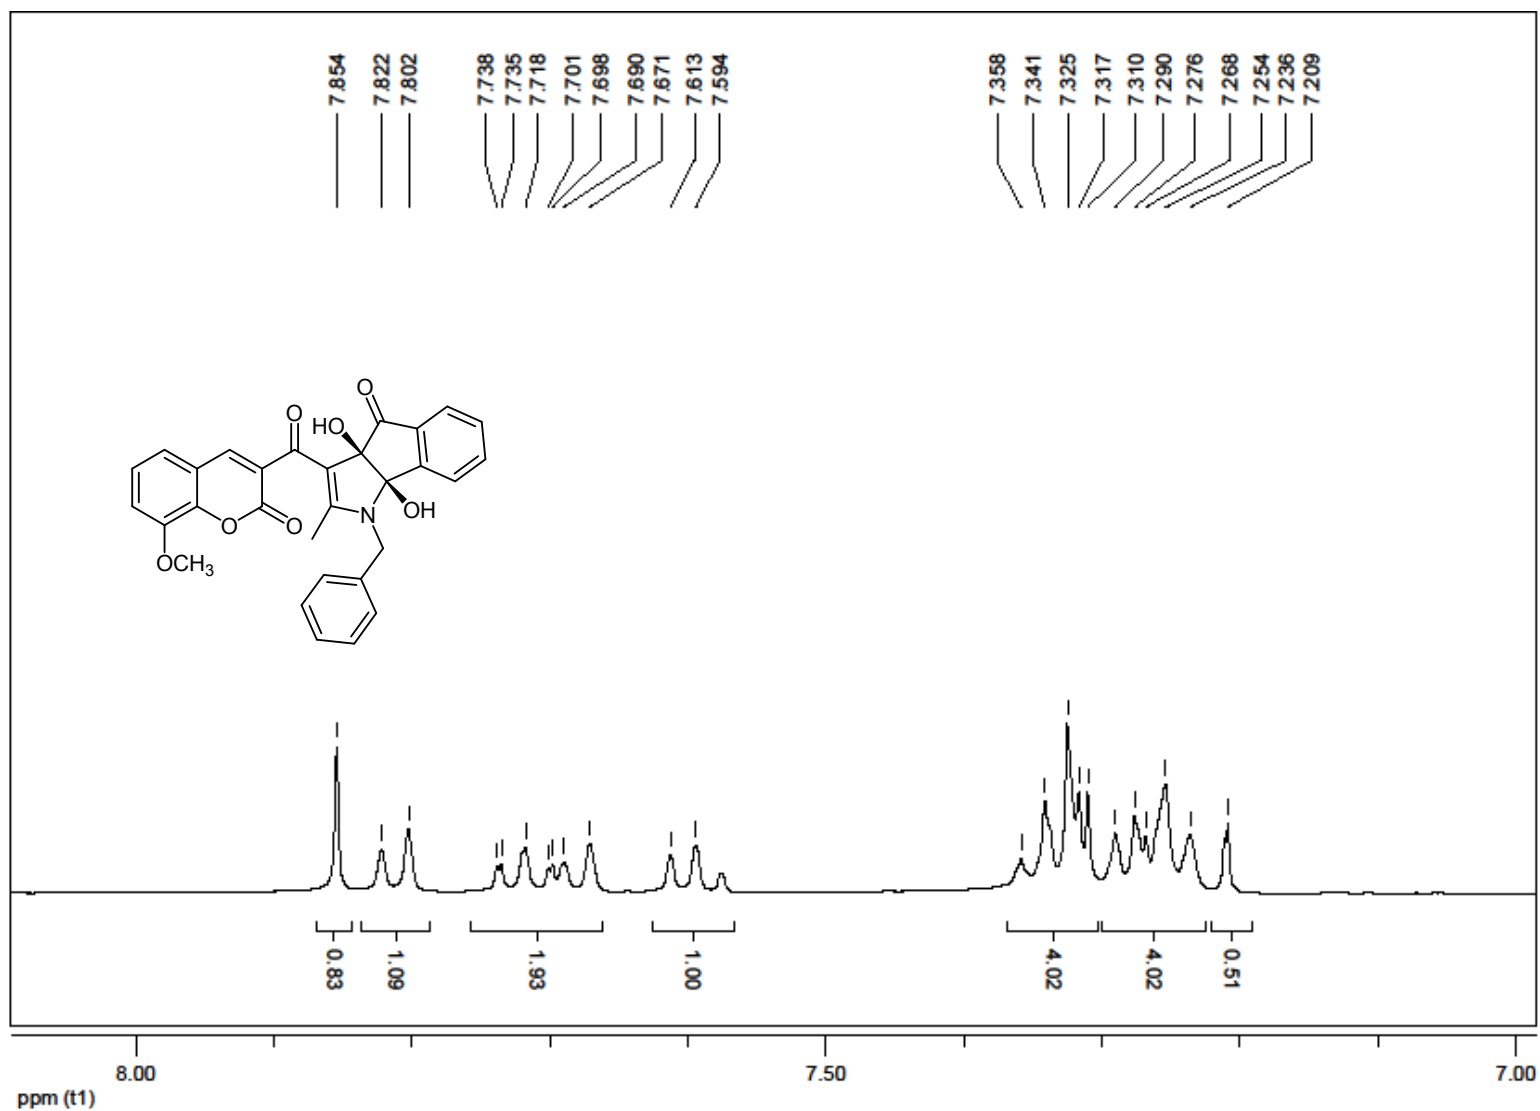

$^1\text{H}$  NMR of 3f (expand)

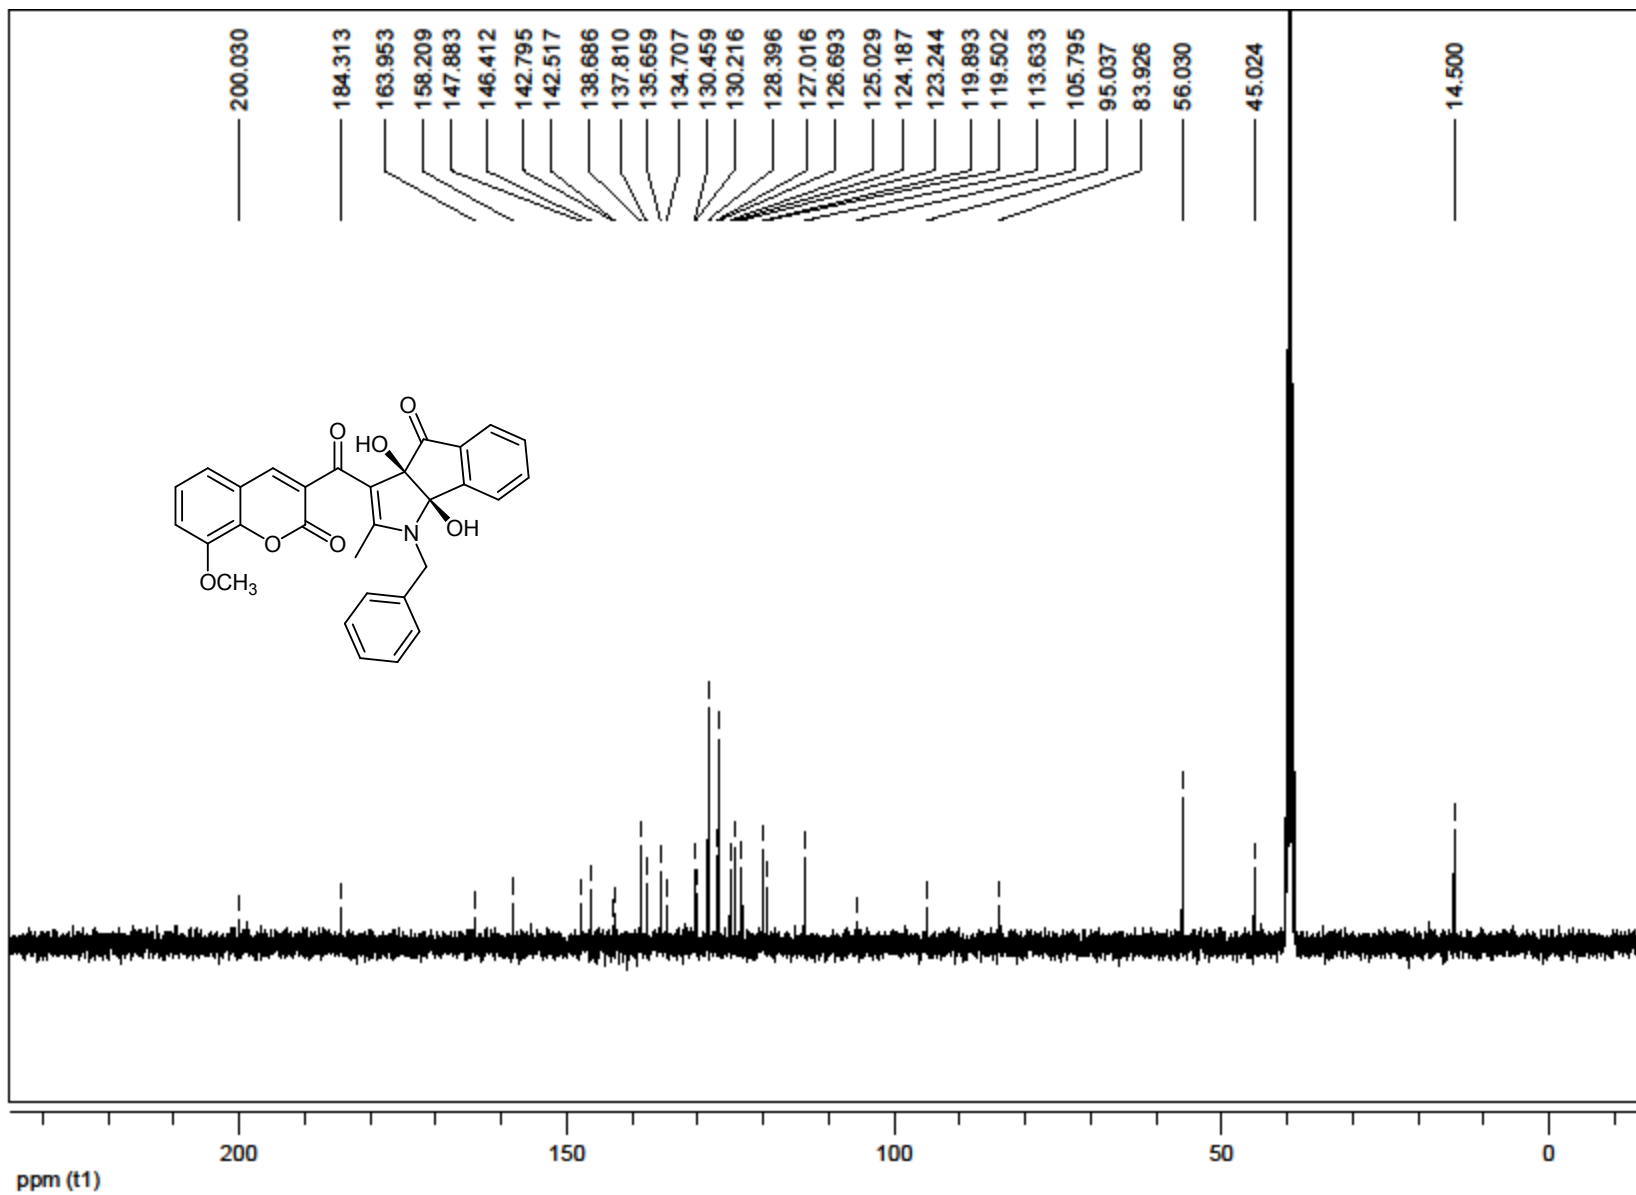

$^{13}\text{C}$  NMR of 3f

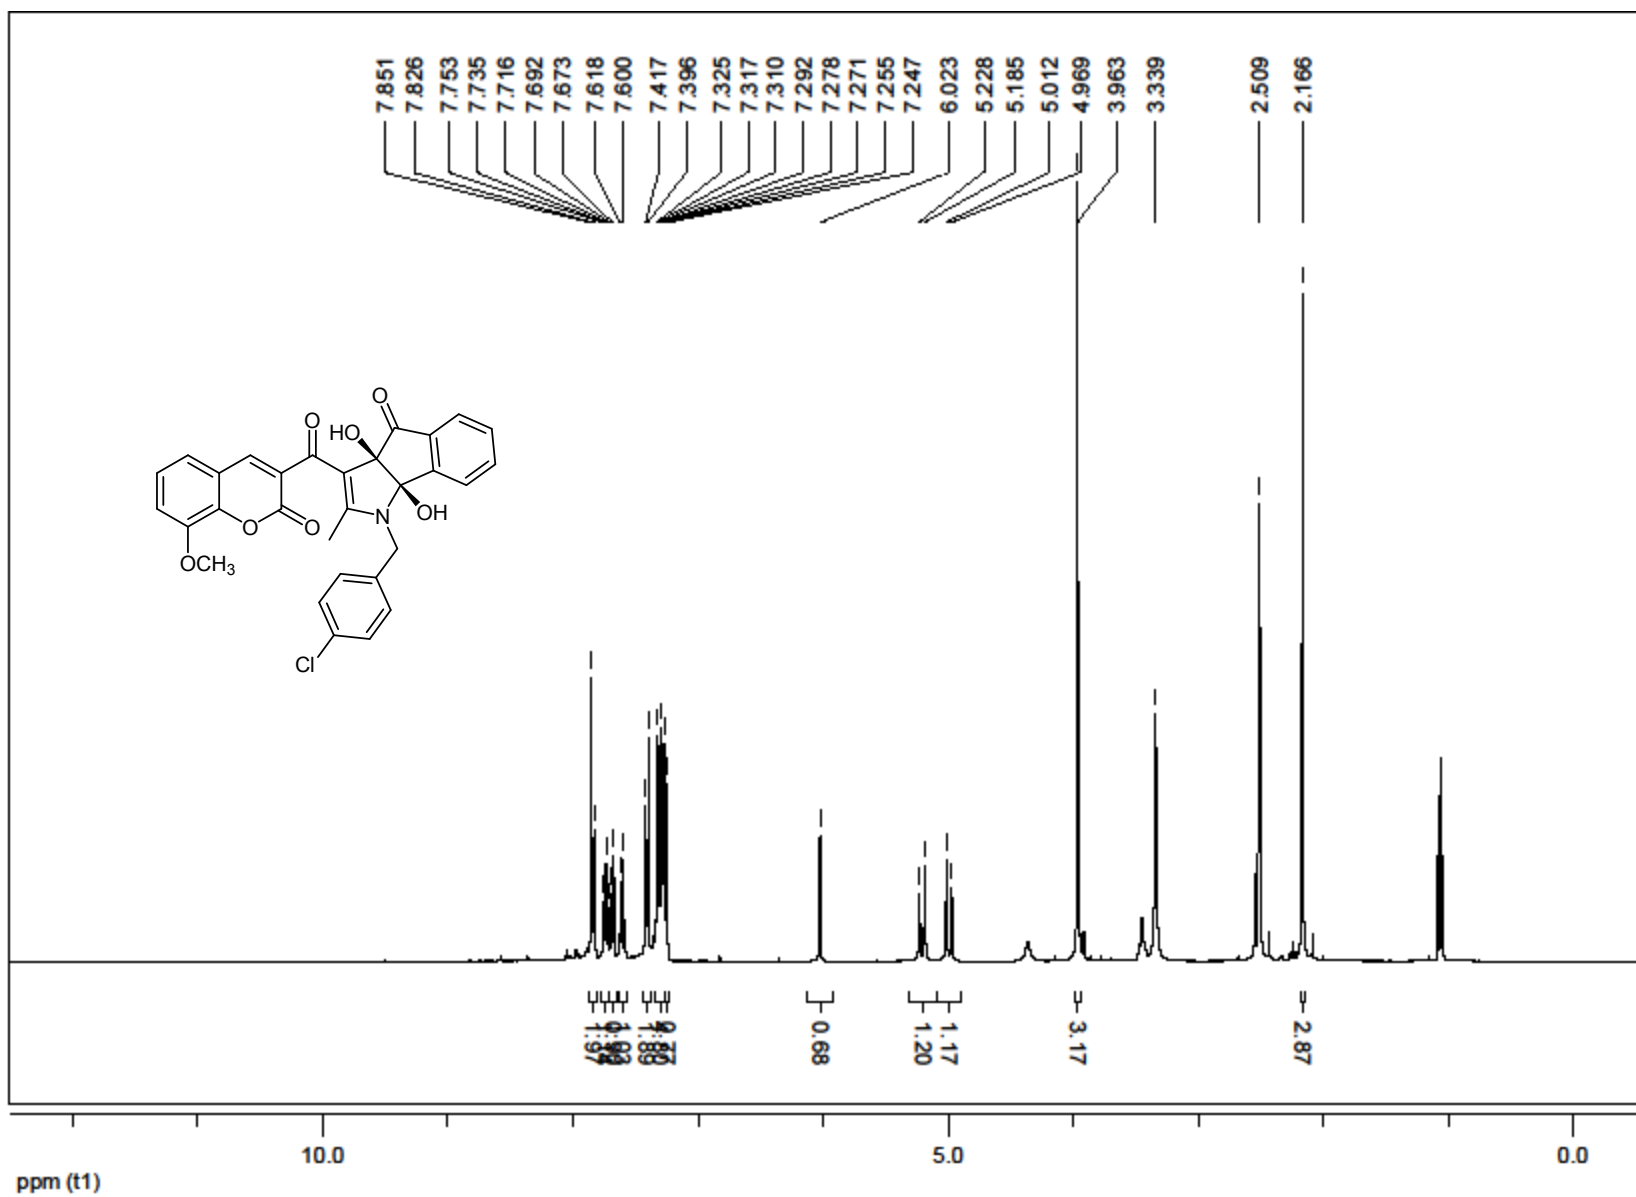

**<sup>1</sup>H NMR of 3g**

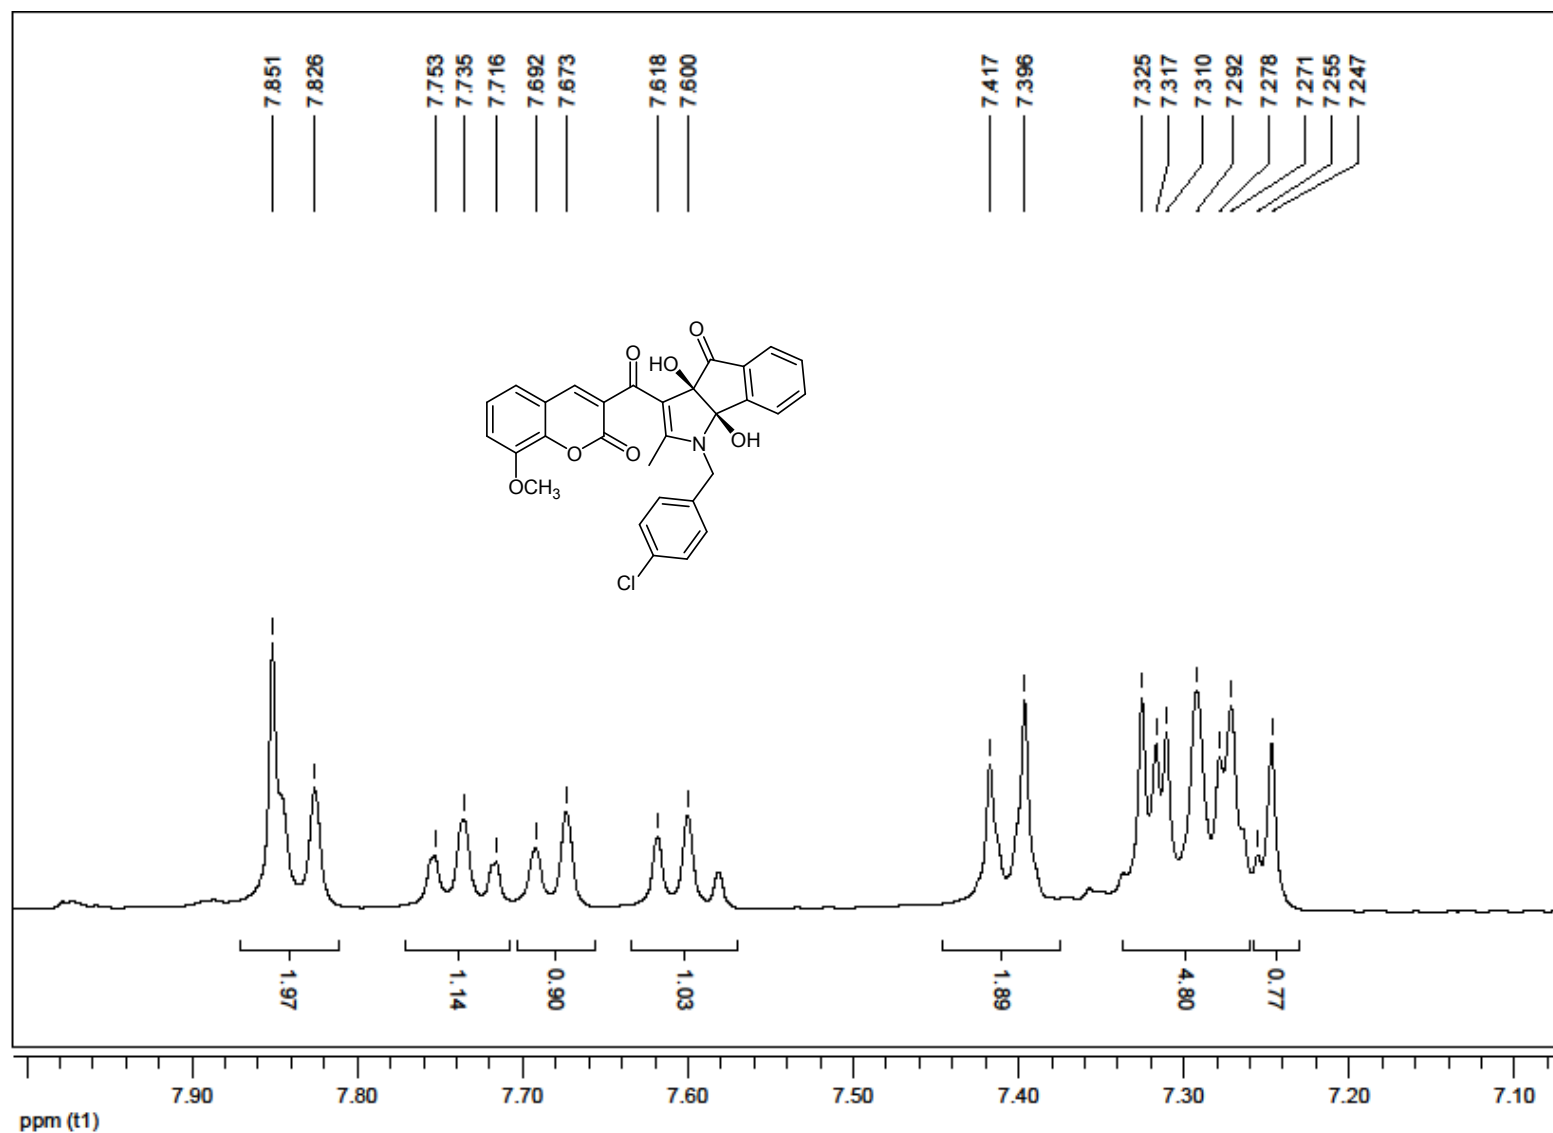

$^1\text{H}$  NMR of 3g (expand)

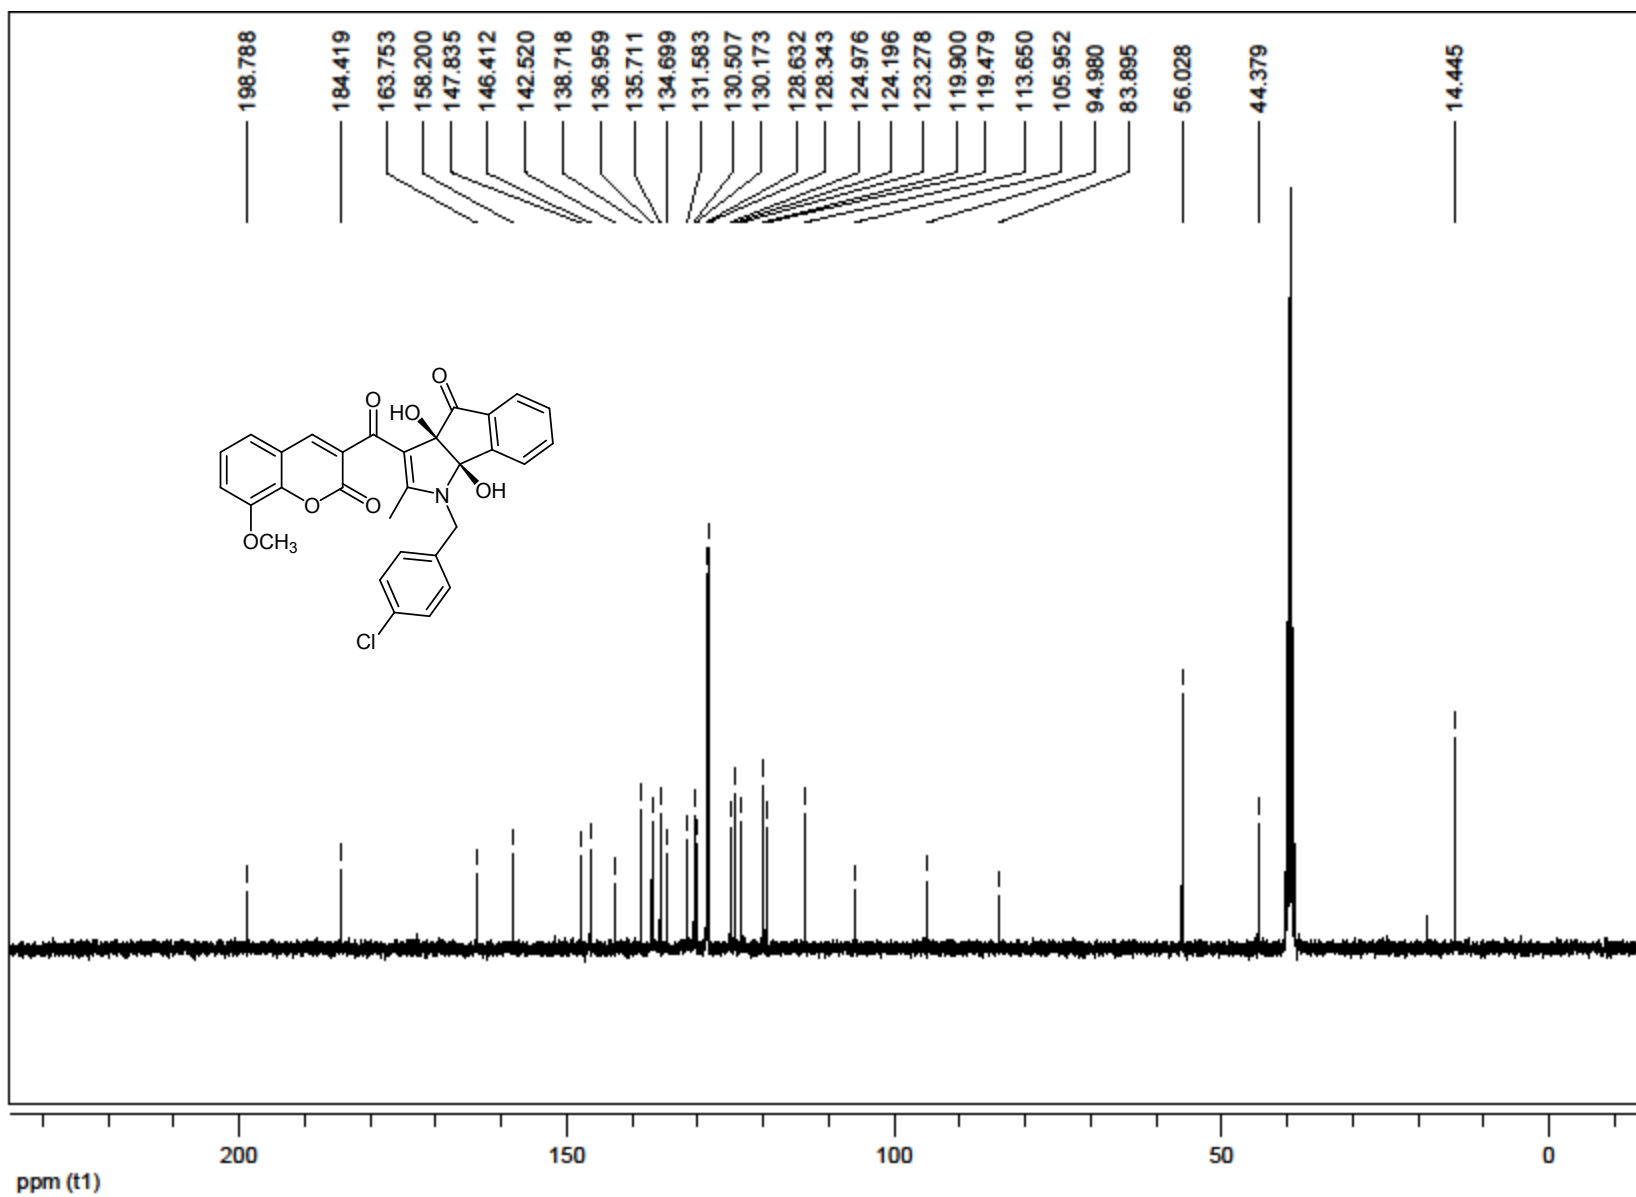

$^{13}\text{C}$  NMR of 3g

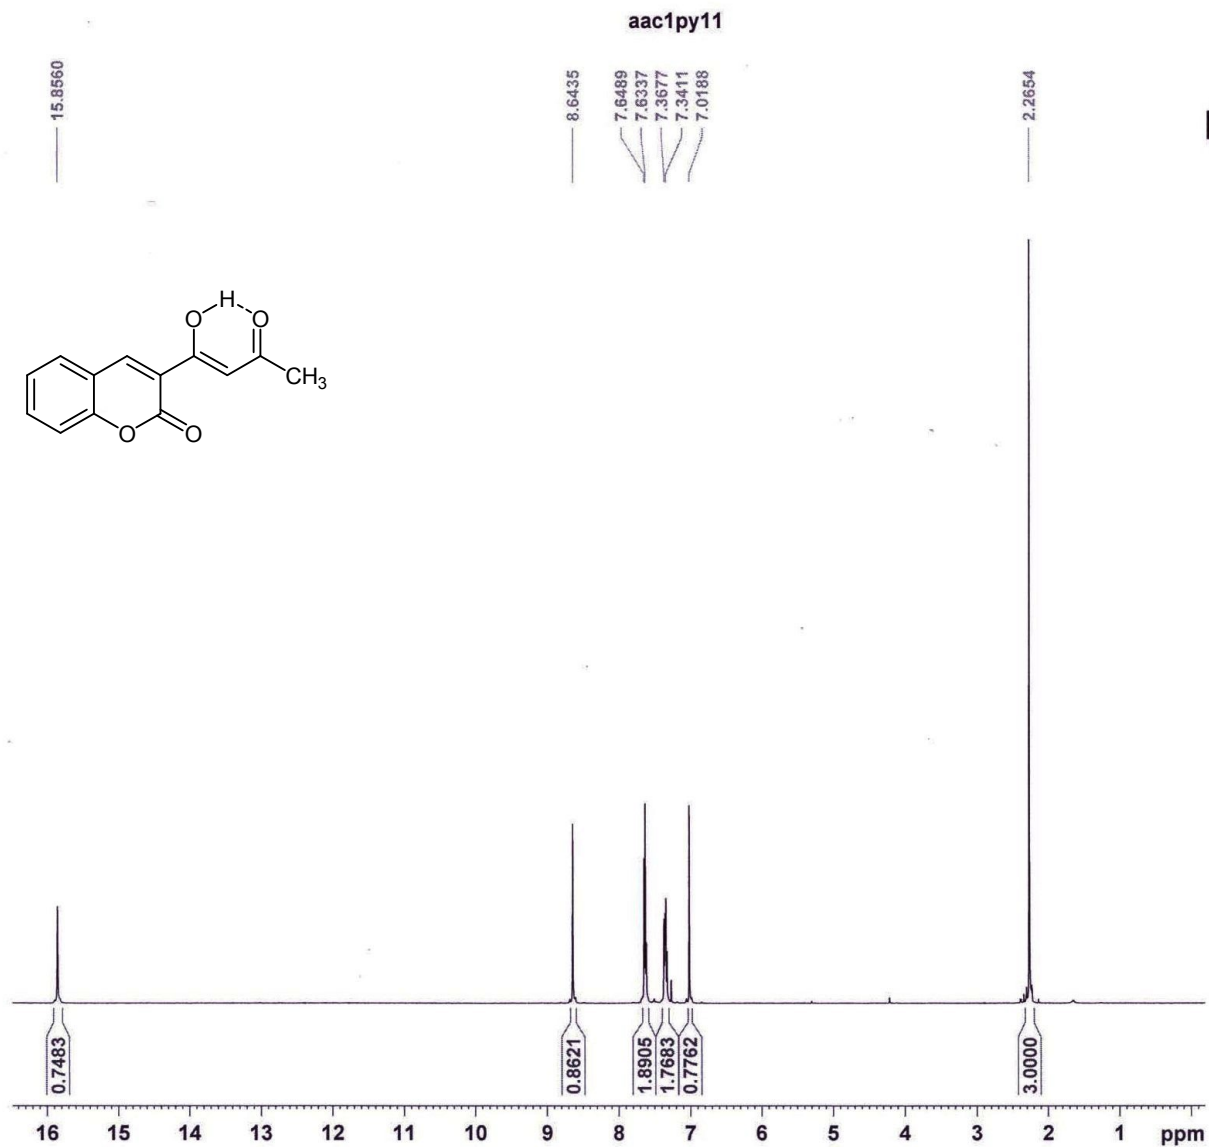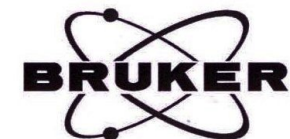

Current Data Parameters  
NAME ghanbaripour  
EXPNO 118  
PROCNO 1

F2 - Acquisition Parameters  
Date\_ 20120214  
Time 16.43  
INSTRUM spect  
PROBHD 5 mm Multinucl  
PULPROG zg  
TD 32768  
SOLVENT CDCl3  
NS 8  
DS 2  
SWH 10330.578 Hz  
FIDRES 0.315264 Hz  
AQ 1.5860696 sec  
RG 50.8  
DW 48.400 usec  
DE 6.00 usec  
TE 300.0 K  
D1 6.00000000 sec  
TD0 1

===== CHANNEL f1 =====  
NUC1 1H  
P1 15.00 usec  
PL1 1.00 dB  
SFO1 500.1330885 MHz

F2 - Processing parameters  
SI 32768  
SF 500.1300095 MHz  
WDW EM  
SSB 0  
LB 0.30 Hz  
GB 0  
PC 1.00

<sup>1</sup>H NMR of 4a

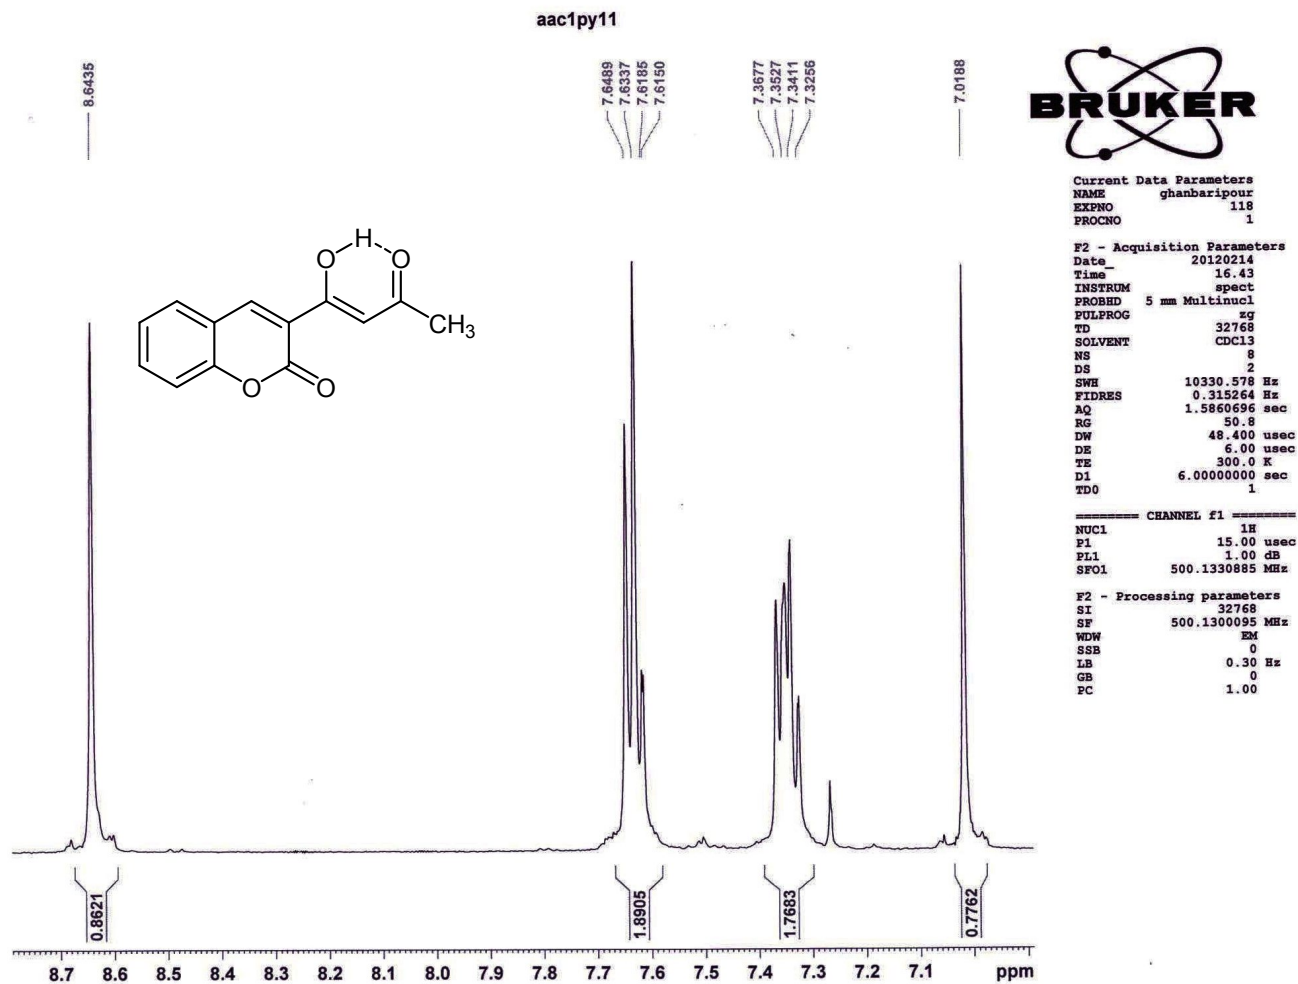

<sup>1</sup>H NMR of 4a (expand)



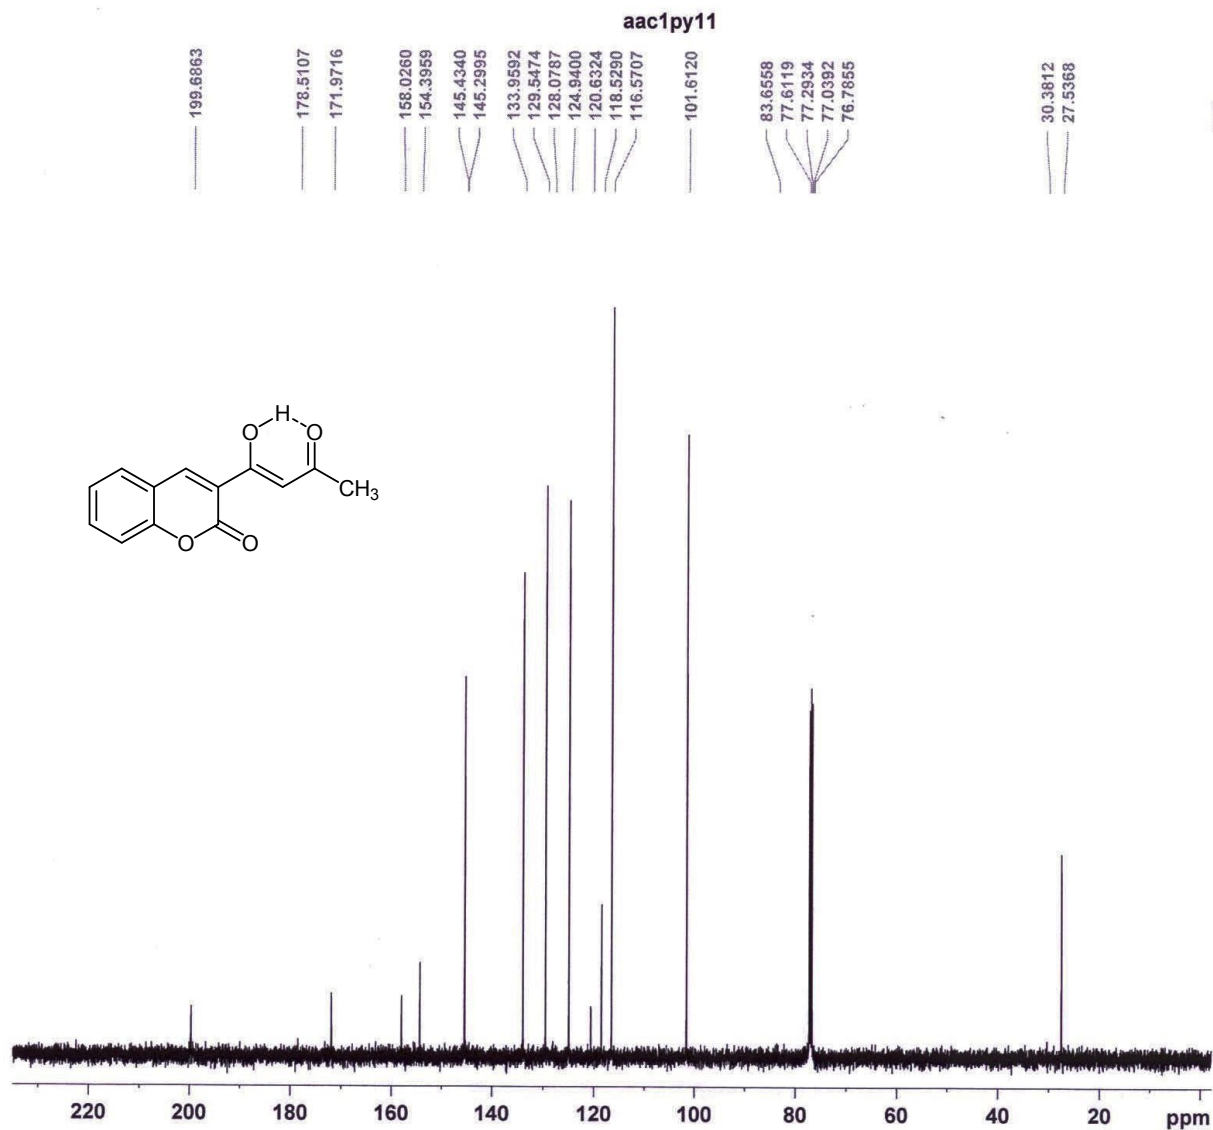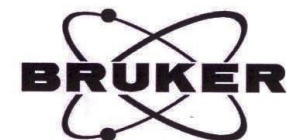

Current Data Parameters  
 NAME ghanbaripour  
 EXPNO 119  
 PROCNO 1

F2 - Acquisition Parameters  
 Date 20120214  
 Time 16.37  
 INSTRUM spect  
 PROBHD 5 mm Multinucl  
 PULPROG zgpg  
 TD 65536  
 SOLVENT CDC13  
 NS 140  
 DS 0  
 SWH 31446.541 Hz  
 FIDRES 0.479836 Hz  
 AQ 1.0420883 sec  
 RG 1625.5  
 DW 15.900 usec  
 DE 6.00 usec  
 TE 300.0 K  
 D1 2.00000000 sec  
 d11 0.03000000 sec  
 DELTA 1.89999998 sec  
 TD0 1

===== CHANNEL f1 =====  
 NUC1 13C  
 P1 10.00 usec  
 PL1 3.00 dB  
 SFO1 125.7716224 MHz

===== CHANNEL f2 =====  
 CPDPRG2 waltz16  
 NUC2 1H  
 PCPD2 100.00 usec  
 PL2 120.00 dB  
 PL12 20.00 dB  
 PL13 20.00 dB  
 SFO2 500.1320005 MHz

F2 - Processing parameters  
 SI 32768  
 SF 125.7577912 MHz  
 WDW EM  
 SSB 0  
 LB 1.00 Hz  
 GB 0  
 PC 1.00

<sup>13</sup>C NMR of 4a

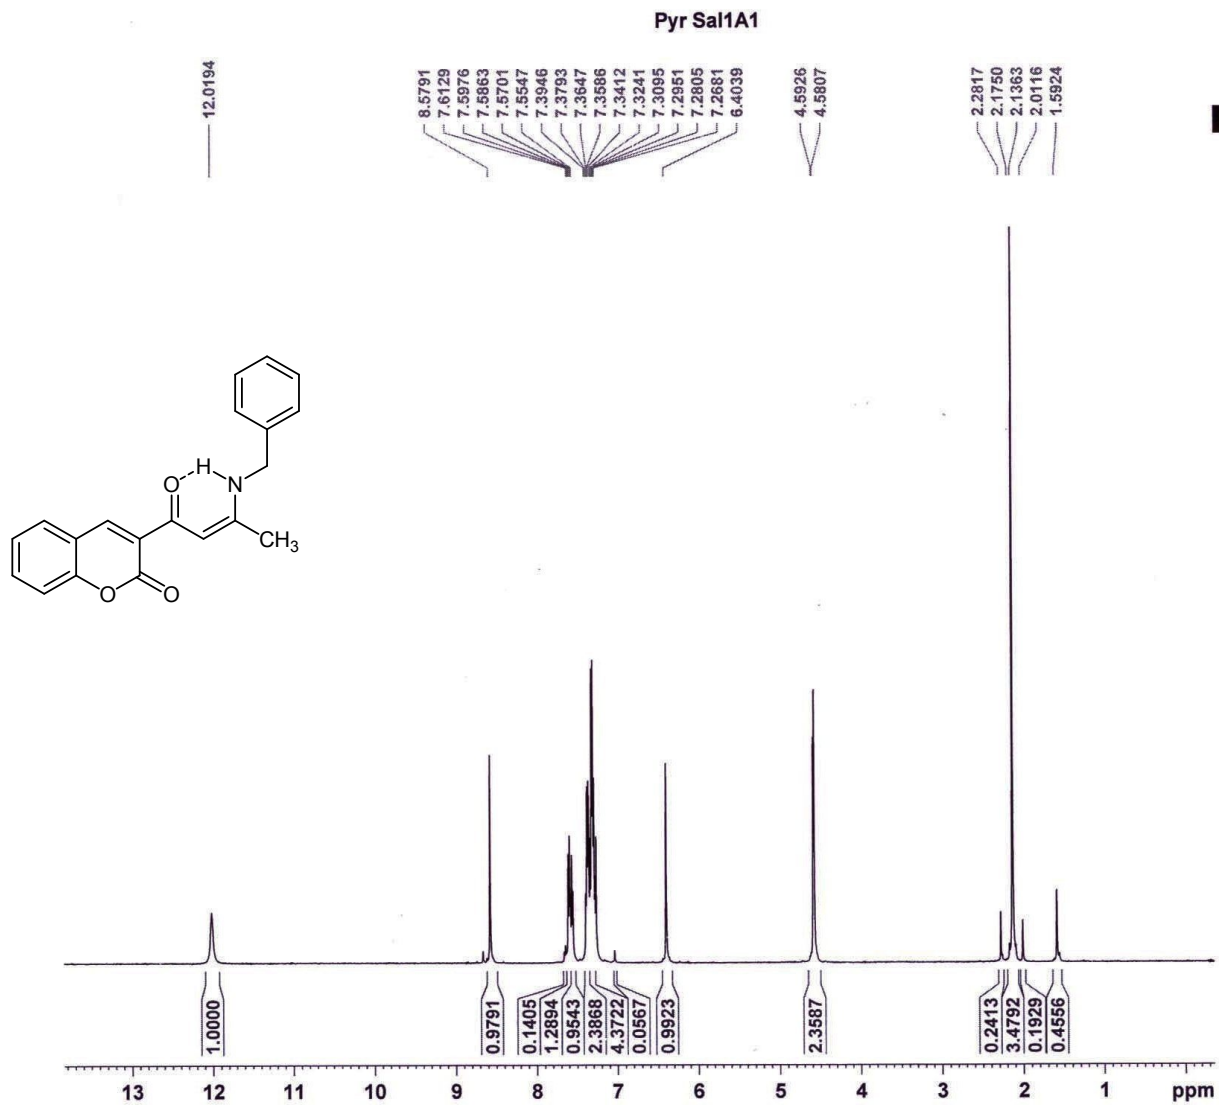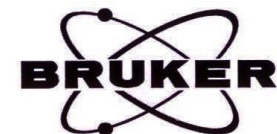

Current Data Parameters  
NAME ghanbaripour  
EXPNO 86  
PROCNO 1

F2 - Acquisition Parameters  
Date\_ 20111115  
Time\_ 21.54  
INSTRUM spect  
PROBHD 5 mm Multinucl  
PULPROG zg  
TD 32768  
SOLVENT CDC13  
NS 8  
DS 2  
SWH 10330.578 Hz  
FIDRES 0.315264 Hz  
AQ 1.5860696 sec  
RG 128  
DW 48.400 usec  
DE 6.00 usec  
TE 300.0 K  
D1 6.00000000 sec  
TD0 1

===== CHANNEL f1 =====  
NUC1 1H  
P1 15.00 usec  
PL1 1.00 dB  
SFO1 500.1330885 MHz

F2 - Processing parameters  
SI 32768  
SF 500.1300095 MHz  
WDW EM  
SSB 0  
LB 0.30 Hz  
GB 0  
PC 1.00

<sup>1</sup>H NMR of 5a

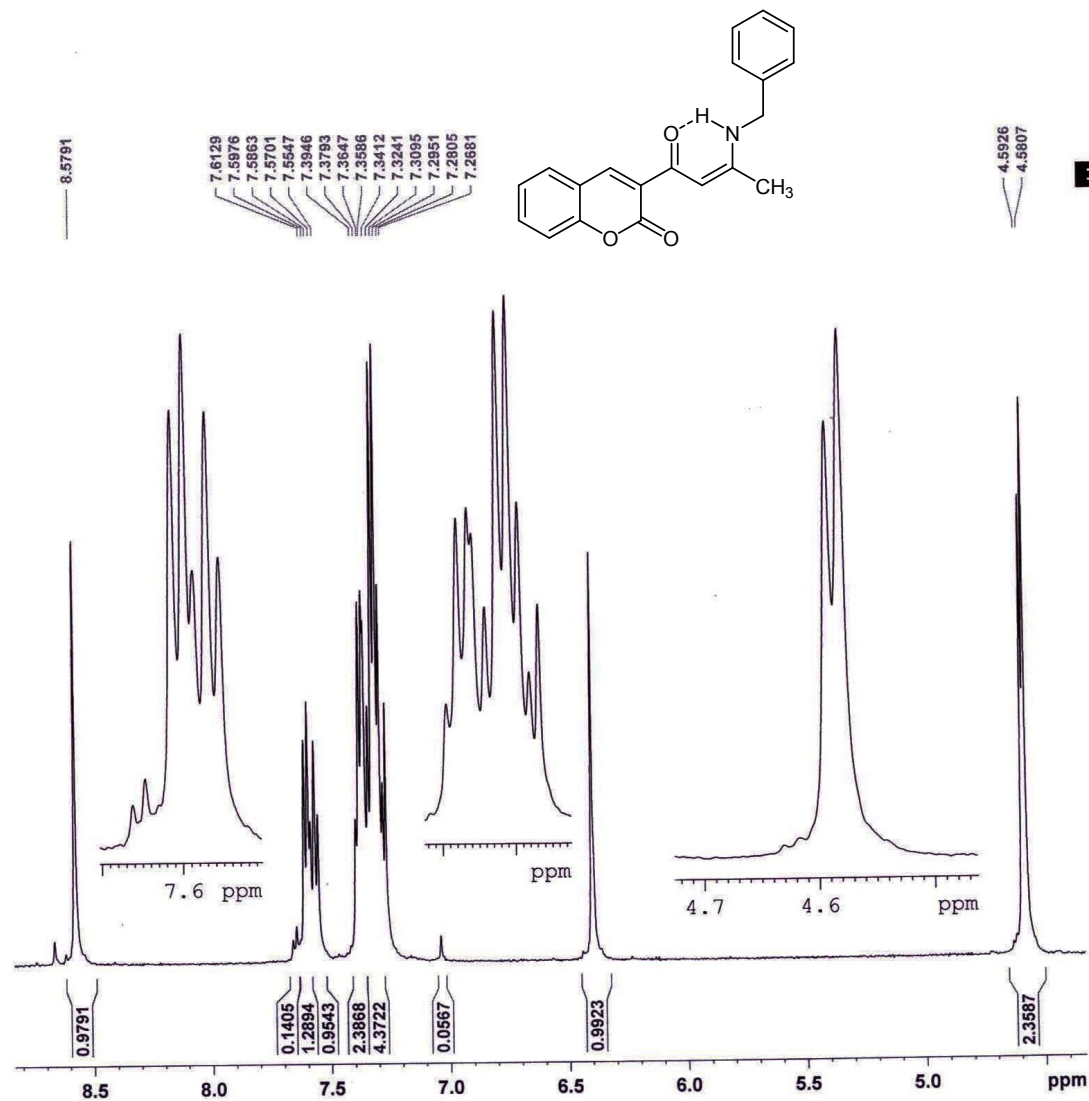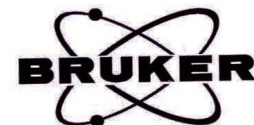

Current Data Parameters  
 NAME ghanbaripour  
 EXPNO 86  
 PROCNO 1

F2 - Acquisition Parameters  
 Date\_ 20111115  
 Time\_ 21.54  
 INSTRUM spect  
 PROBRD 5 mm Multinucl  
 PULPROG zg  
 TD 32768  
 SOLVENT CDCl3  
 NS 8  
 DS 2  
 SWH 10330.578 Hz  
 FIDRES 0.315264 Hz  
 AQ 1.5860696 sec  
 RG 128  
 DW 48.400 usec  
 DE 6.00 usec  
 TE 300.0 K  
 D1 6.00000000 sec  
 TD0 1

===== CHANNEL f1 =====  
 NUC1 1H  
 P1 15.00 usec  
 PL1 1.00 dB  
 SFO1 500.1330885 MHz

F2 - Processing parameters  
 SI 32768  
 SF 500.1300095 MHz  
 WDW EM  
 SSB 0  
 LB 0.30 Hz  
 GB 0  
 PC 1.00

<sup>1</sup>H NMR of 5a (expand)

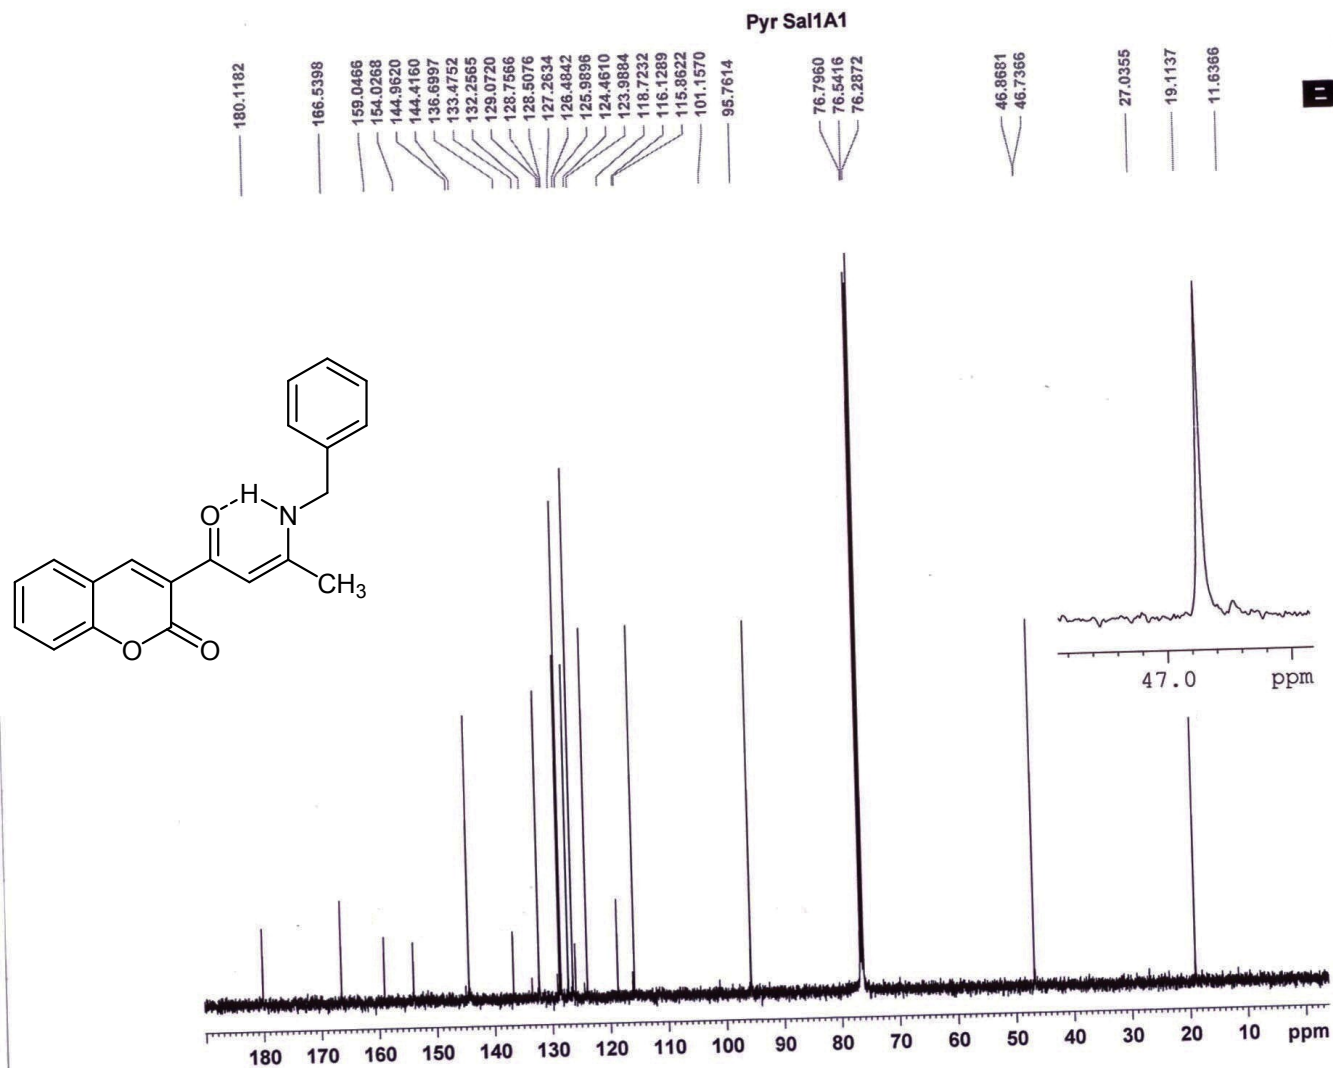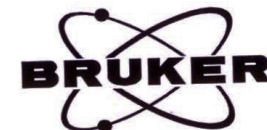

Current Data Parameters  
 NAME ghanbaripour  
 EXPNO 87  
 PROCNO 1

F2 - Acquisition Parameters  
 Date\_ 20111118  
 Time\_ 21.44  
 INSTRUM spect  
 PROBHD 5 mm Multinucl  
 PULPROG zgpg  
 TD 65536  
 SOLVENT CDC13  
 NS 1224  
 DS 0  
 SWH 31446.541 Hz  
 FIDRES 0.479836 Hz  
 AQ 1.0420883 sec  
 RG 1448.2  
 DW 15.900 usec  
 DE 6.00 usec  
 TE 300.0 K  
 D1 2.00000000 sec  
 d11 0.03000000 sec  
 DELTA 1.89999998 sec  
 TD0 1

===== CHANNEL f1 =====  
 NUC1 13C  
 P1 10.00 usec  
 PL1 3.00 dB  
 SFO1 125.7716224 MHz

===== CHANNEL f2 =====  
 CPDPRG2 waltz16  
 NUC2 1H  
 PCPD2 100.00 usec  
 PL2 120.00 dB  
 PL12 20.00 dB  
 PL13 20.00 dB  
 SFO2 500.1320005 MHz

F2 - Processing parameters  
 SI 32768  
 SF 125.7578484 MHz  
 WDW EM  
 SSB 0  
 LB 1.00 Hz  
 GB 0  
 PC 1.00

$^{13}\text{C}$  NMR of 5a

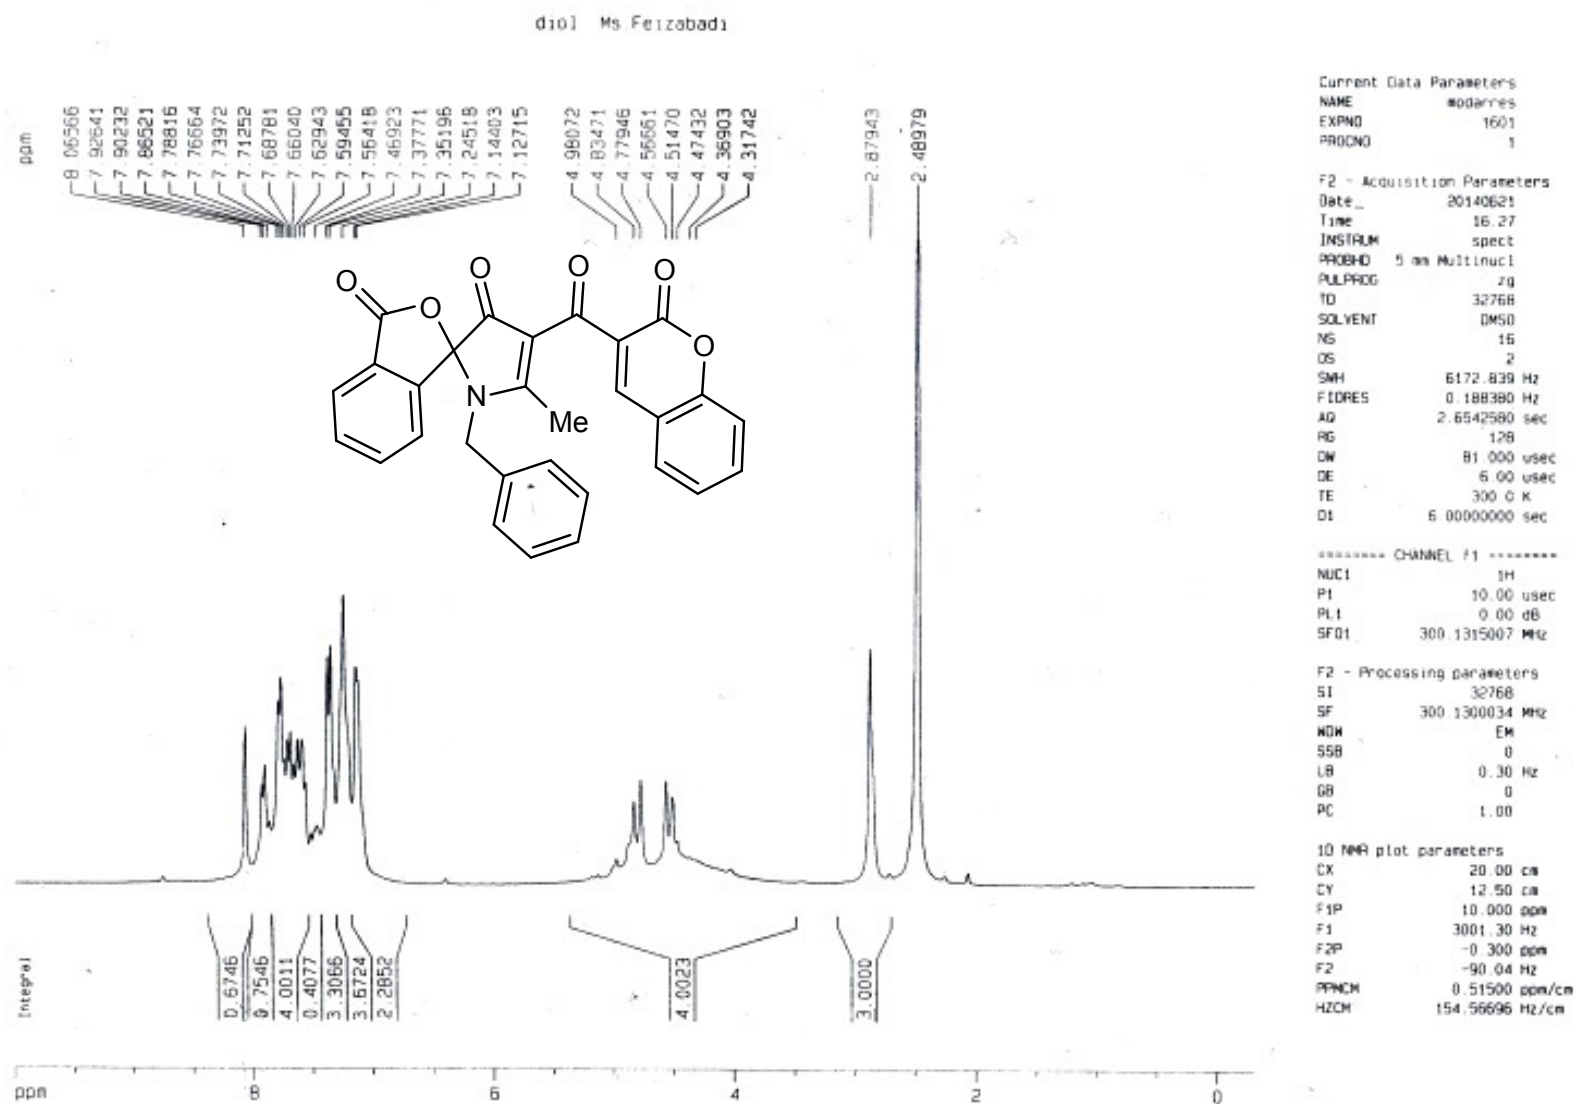

**<sup>1</sup>H NMR of 7a**

dicl Ms.Feizabadi

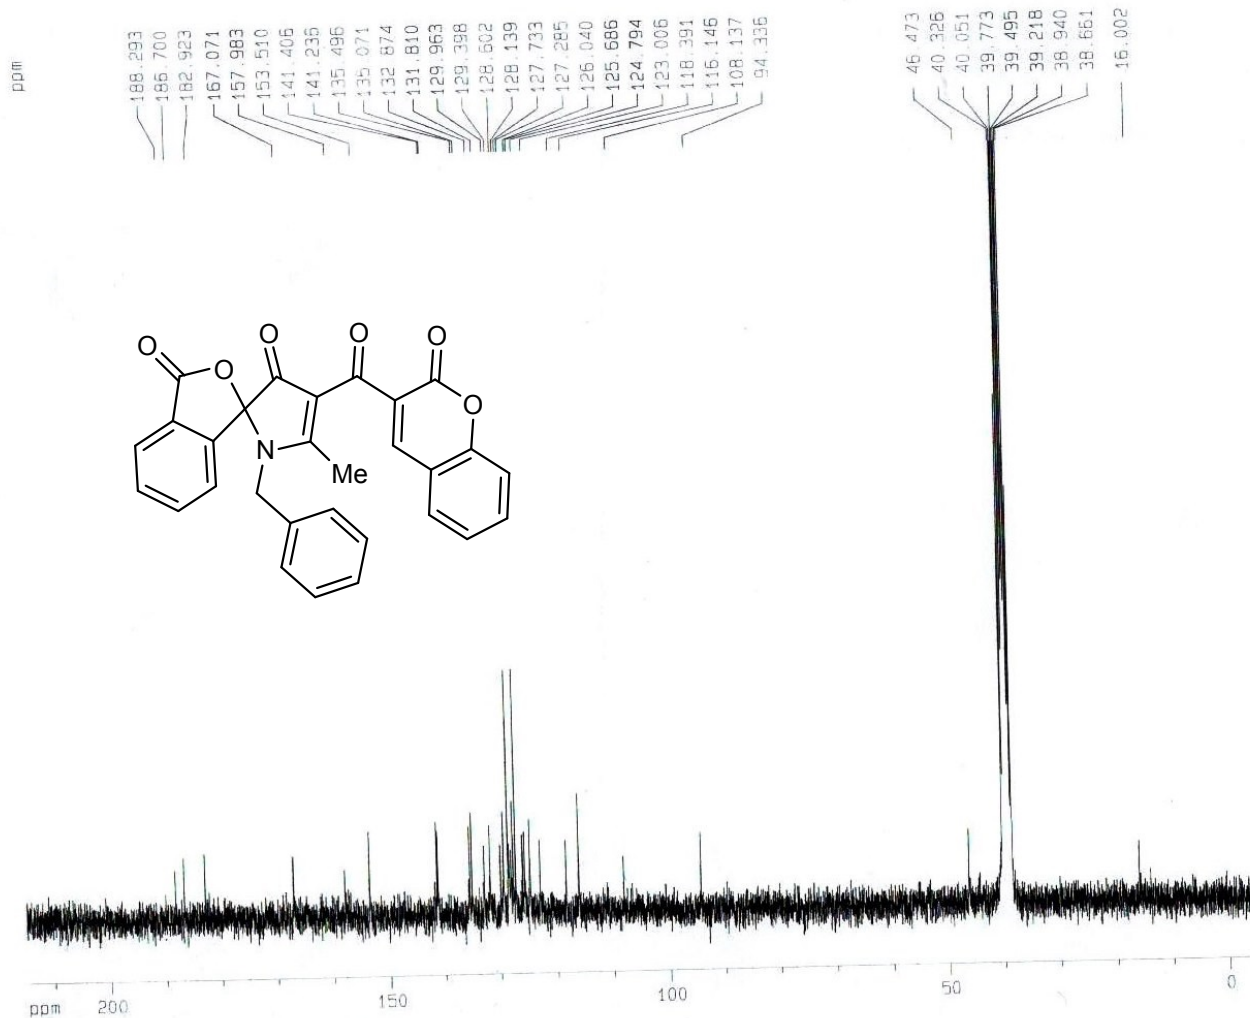

Current Data Parameters  
NAME modarres  
EXPNO 1602  
PROCNO 1

F2 - Acquisition Parameters  
Date\_ 20140621  
Time 16.40  
INSTRUM spect  
PROBHD 5 mm Multinucl  
PULPROG zgpg30  
TD 32768  
FIDRES 0.548877 Hz  
AQ 0.9110004 sec  
RG 23170.5  
DW 27.800 usec  
DE 6.00 usec  
TE 300.0 K  
D1 2.00000000 sec  
d11 0.03000000 sec  
d12 0.00002000 sec

===== CHANNEL f1 =====  
NUC1 13C  
P1 7.00 usec  
PL1 -4.00 dB  
SFO1 75.4752953 MHz

===== CHANNEL f2 =====  
CPOPRG2 waitz16  
NUC2 1H  
PCPD2 80.00 usec  
PL2 0.00 dB  
PL12 21.00 dB  
PL13 21.00 dB  
SFO2 300.1312005 MHz

F2 - Processing parameters  
SI 65536  
SF 75.4677829 MHz  
WDW EM  
SSB 0  
LB 1.00 Hz  
GB 0  
PC 1.40

1D NMR plot parameters  
CX 20.00 cm  
CY 50.00 cm  
F1P 215.000 ppm  
F1 16225.57 Hz  
F2P -5.000 ppm  
F2 -377.34 Hz  
PRMCM 11.00000 ppm/cm  
HZCM 830.14557 Hz/cm

<sup>13</sup>C NMR of 7a



MF.46 Ms.Feizabadi

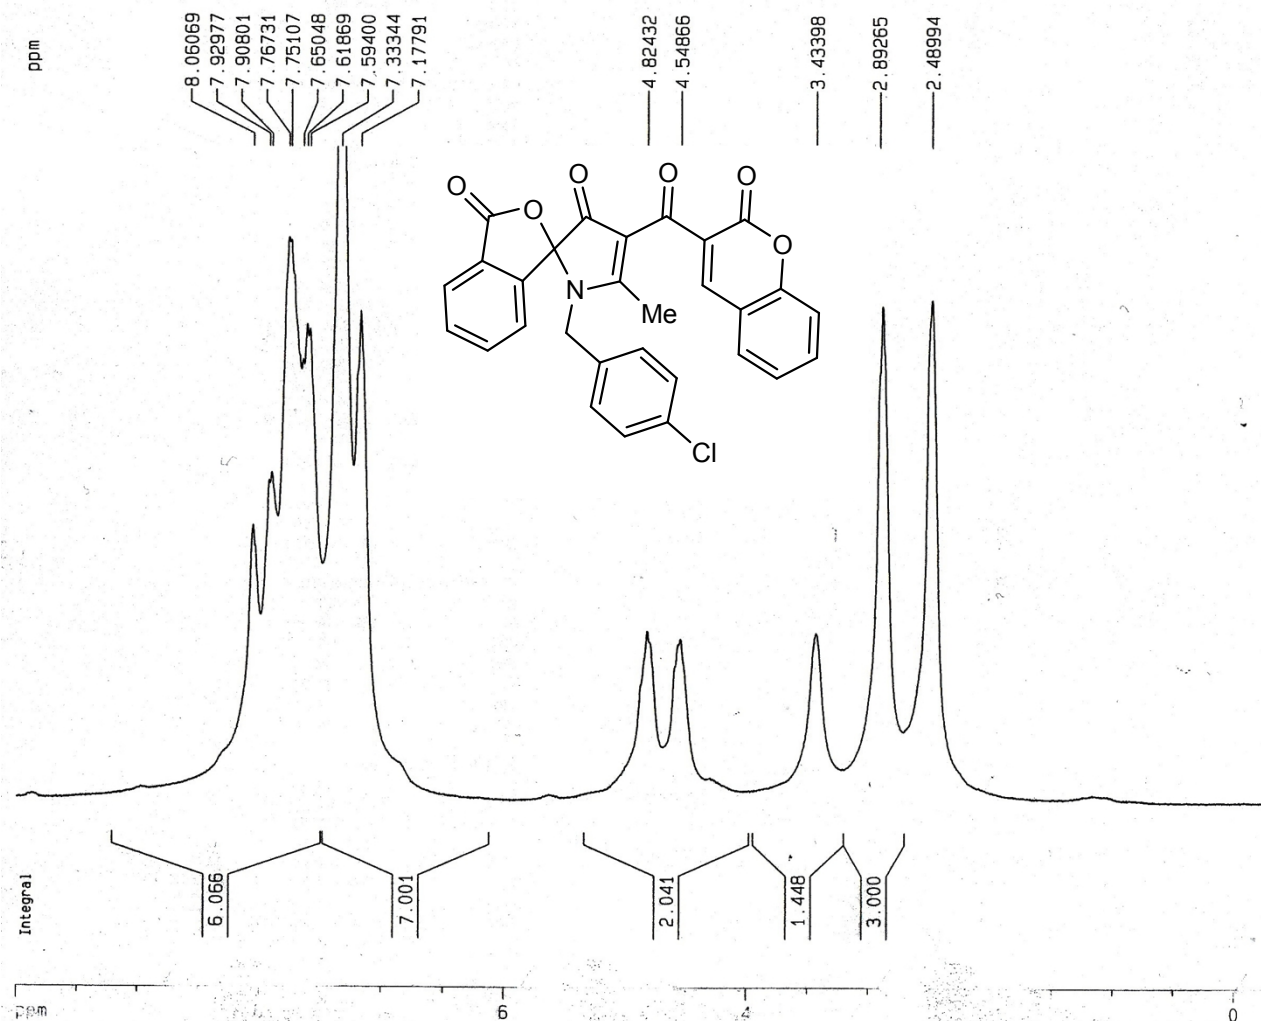

Current Data Parameters  
NAME modarres  
EXPNO 1663  
PROCNO 1

F2-- Acquisition Parameters  
Date\_ 20141222  
Time 18.14  
INSTRUM spect  
PROBHD 5 mm Multinucl  
PULPROG zg  
TD 32768  
SOLVENT DMSO  
NS 16  
DS 2  
SWH 6172.839 Hz  
FIDRES 0.188380 Hz  
AQ 2.6542580 sec  
RG 114  
DW 81.000 usec  
DE 6.00 usec  
TE 300.0 K  
D1 6.00000000 sec

===== CHANNEL f1 =====  
NUC1 1H  
P1 10.00 usec  
PL1 0.00 dB  
SF01 300.1315007 MHz

F2-- Processing parameters  
SI 32768  
SF 300.1300034 MHz  
WDW EM  
SSB 0  
LB 0.30 Hz  
GB 0  
PC 1.00

1D NMR plot parameters  
CX 20.00 cm  
CY 12.50 cm  
F1P 10.000 ppm  
F1 3001.30 Hz  
F2P -0.300 ppm  
F2 -90.04 Hz  
PPMCM 0.51500 ppm/cm  
HZCM 154.56694 Hz/cm

<sup>1</sup>H NMR of 7b

S31

MF.46 Ms.Feizabadi

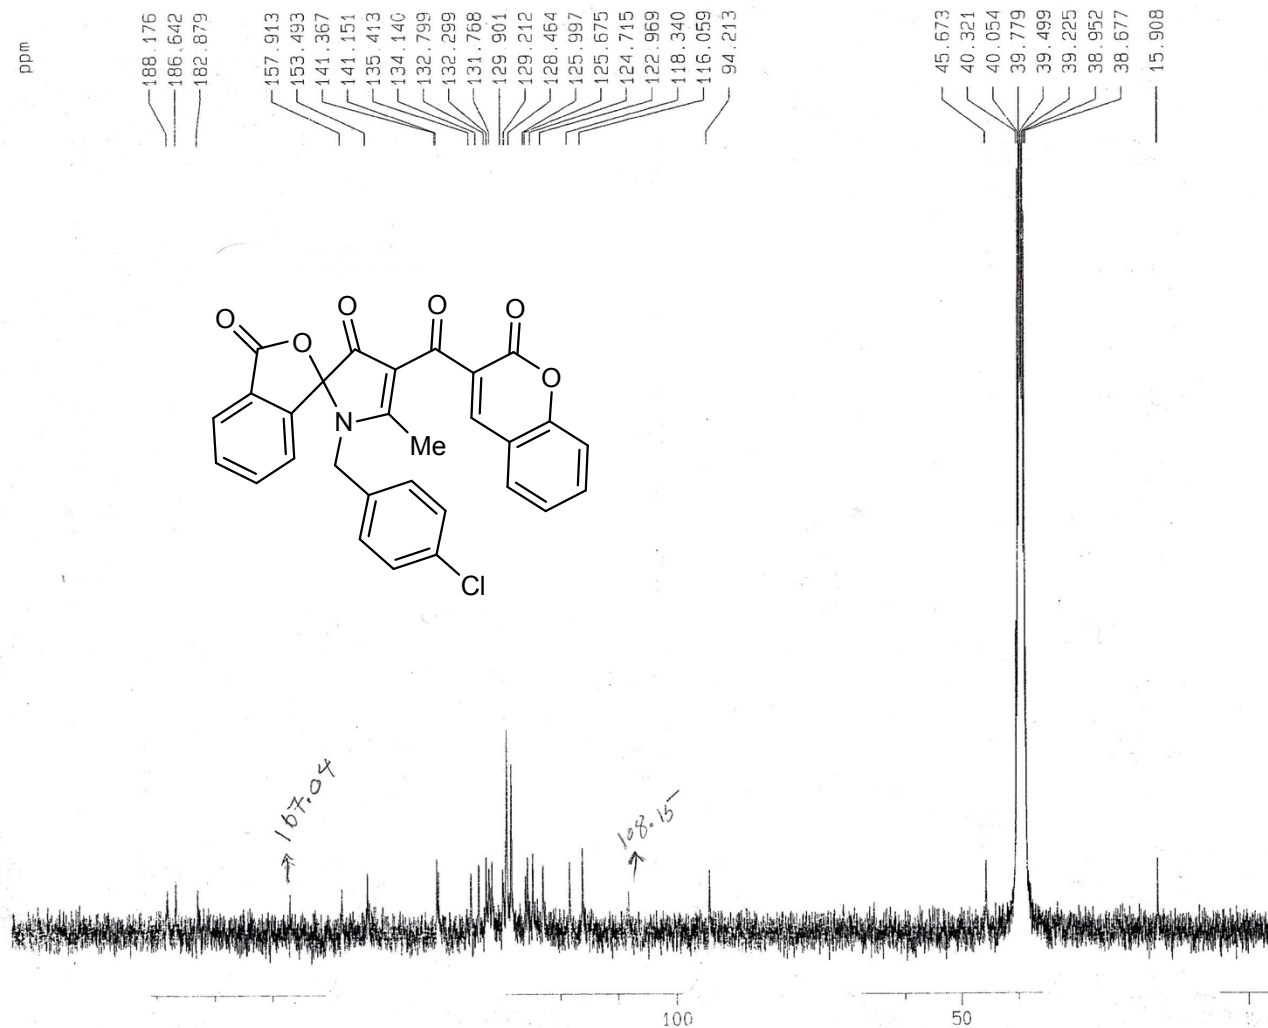

Current Data Parameters  
NAME modarres  
EXPNO 1664  
PROCNO 1

F2 - Acquisition Parameters  
Date\_ 20141222  
Time 17.26  
INSTRUM spect  
PROBHD 5 mm Multinucl  
PULPROG zgpg30  
TD 32768  
SOLVENT DMSO  
NS 1024  
DS 0  
SWH 17985.611 Hz  
FIDRES 0.548877 Hz  
AQ 0.9110004 sec  
RG 14596.5  
DW 27.800 usec  
DE 6.00 usec  
TE 300.0 K  
D1 2.00000000 sec  
d11 0.03000000 sec  
d12 0.00002000 sec

===== CHANNEL f1 =====  
NUC1 13C  
P1 7.00 usec  
PL1 -4.00 dB  
SF01 75.4752953 MHz

===== CHANNEL f2 =====  
CPDPRG2 waltz16  
NUC2 1H  
PCPD2 80.00 usec  
PL2 0.00 dB  
PL12 21.00 dB  
PL13 21.00 dB  
SF02 300.1312005 MHz

F2 - Processing parameters  
SI 65536  
SF 75.4677861 MHz  
WDW EM  
SSB 0  
LB 1.00 Hz  
GB 0  
PC 1.40

1D NMR plot parameters  
CX 20.00 cm  
CY 25.00 cm  
F1P 215.000 ppm  
F1 1525.57 Hz  
F2P 1525.57 Hz  
F2 1525.57 Hz  
PPMCM 1525.57 Hz  
HZCM 1525.57 Hz

<sup>13</sup>C NMR of 7b

S32



MF.45 Ms.Feizabadi

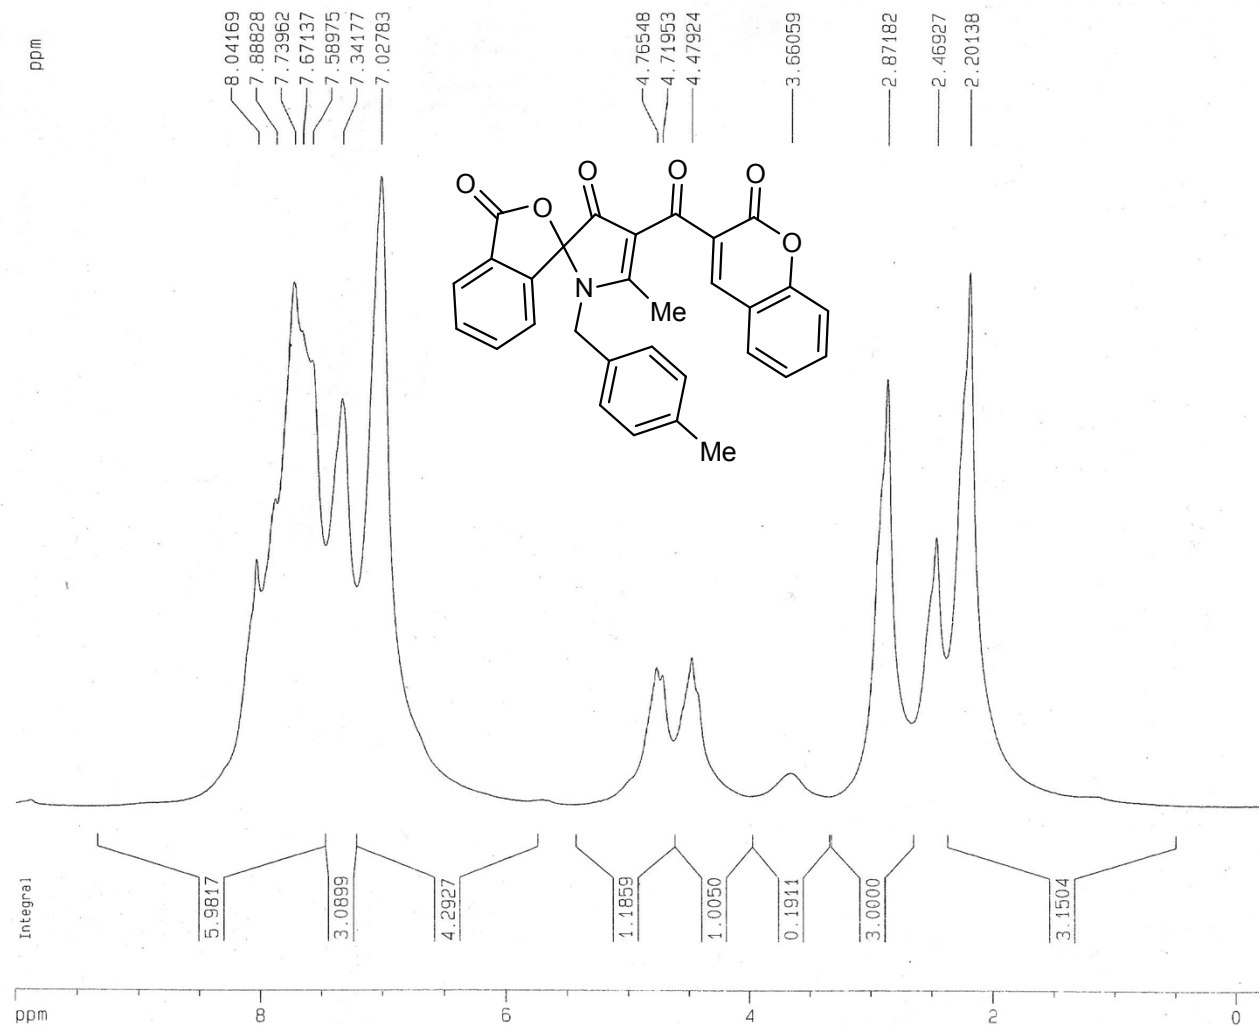

Current Data Parameters  
NAME modarres  
EXPNO 1655  
PROCNO 1

F2 - Acquisition Parameters  
Date\_ 20141204  
Time 13.27  
INSTRUM spect  
PROBHD 5 mm Multinucl  
PULPROG zg  
TD 32768  
SOLVENT DMSO  
NS 16  
DS 2  
SWH 6172.839 Hz  
FIDRES 0.188380 Hz  
AQ 2.6542580 sec  
RG 40.3  
DW 81.000 usec  
DE 6.00 usec  
TE 300.0 K  
D1 6.00000000 sec

===== CHANNEL f1 =====  
NUC1 1H  
P1 10.00 usec  
PL1 0.00 dB  
SF01 300.1315007 MHz

F2 - Processing parameters  
SI 32768  
SF 300.1300043 MHz  
WDW EM  
SSB 0  
LB 0.30 Hz  
GB 0  
PC 1.00

1D NMR plot parameters  
CX 20.00 cm  
CY 10.00 cm  
F1P 10.000 ppm  
F1 3001.30 Hz  
F2P -0.300 ppm  
F2 -90.04 Hz  
PPHMC 0.51500 ppm/cm  
HZCM 154.56696 Hz/cm

<sup>1</sup>H NMR of 7c

S33

MF.45 Ms.Feizabadi

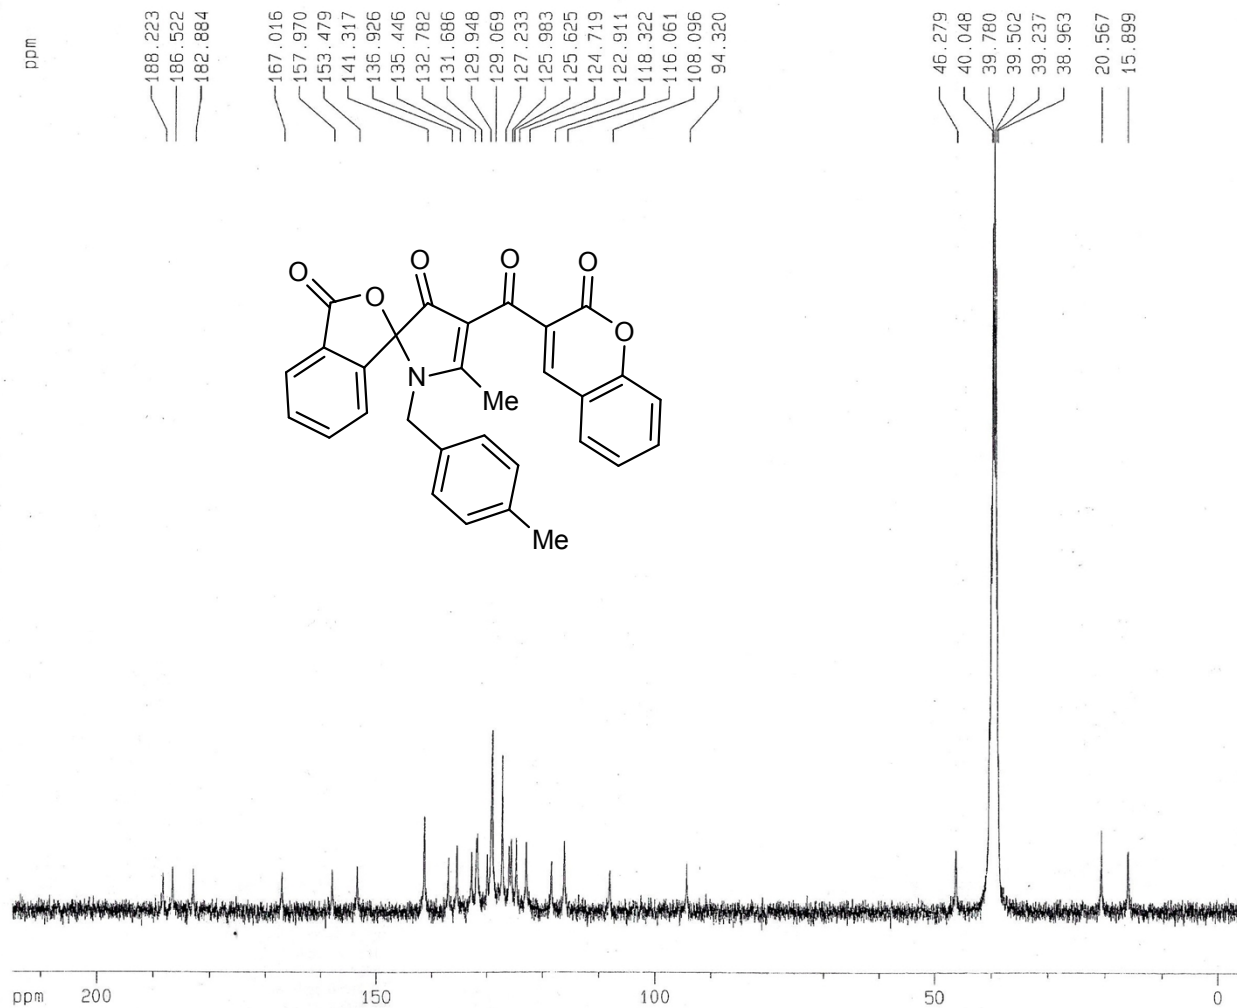

#### Current Data Parameters

NAME modarres  
EXPNO 1656  
PROCNO 1

#### F2 - Acquisition Parameters

Date\_ 20141204  
Time 12.35  
INSTRUM spect  
PROBHD 5 mm Multinucl  
PULPROG zgpg30  
TD 32768  
SOLVENT DMSO  
NS 1024  
DS 0  
SMH 17985.611 Hz  
FIDRES 0.548877 Hz  
AQ 0.9110004 sec  
RG 14596.5  
DW 27.800 usec  
DE 6.00 usec  
TE 300.0 K  
D1 2.00000000 sec  
d11 0.03000000 sec  
d12 0.00002000 sec

#### ===== CHANNEL f1 =====

NUC1 13C  
P1 7.00 usec  
PL1 -4.00 dB  
SF01 75.4752953 MHz

#### ===== CHANNEL f2 =====

CPDPRG2 waltz16  
NUC2 1H  
PCPD2 80.00 usec  
PL2 0.00 dB  
PL12 21.00 dB  
PL13 21.00 dB  
SF02 300.1312005 MHz

#### F2 - Processing parameters

SI 65536  
SF 75.4677866 MHz  
WDW EM  
SSB 0  
LB 1.00 Hz  
GB 0  
PC 1.40

#### 1D NMR plot parameters

CX 20.00 cm  
CY 12.50 cm  
F1P 215.000 ppm  
F1 16225.57 Hz  
F2P -5.000 ppm  
F2 -377.34 Hz  
PPMCM 11.00000 ppm/cm  
HZCM 830.14563 Hz/cm

<sup>13</sup>C NMR of 7c

S34

MF.47 Ms.Feizabadi

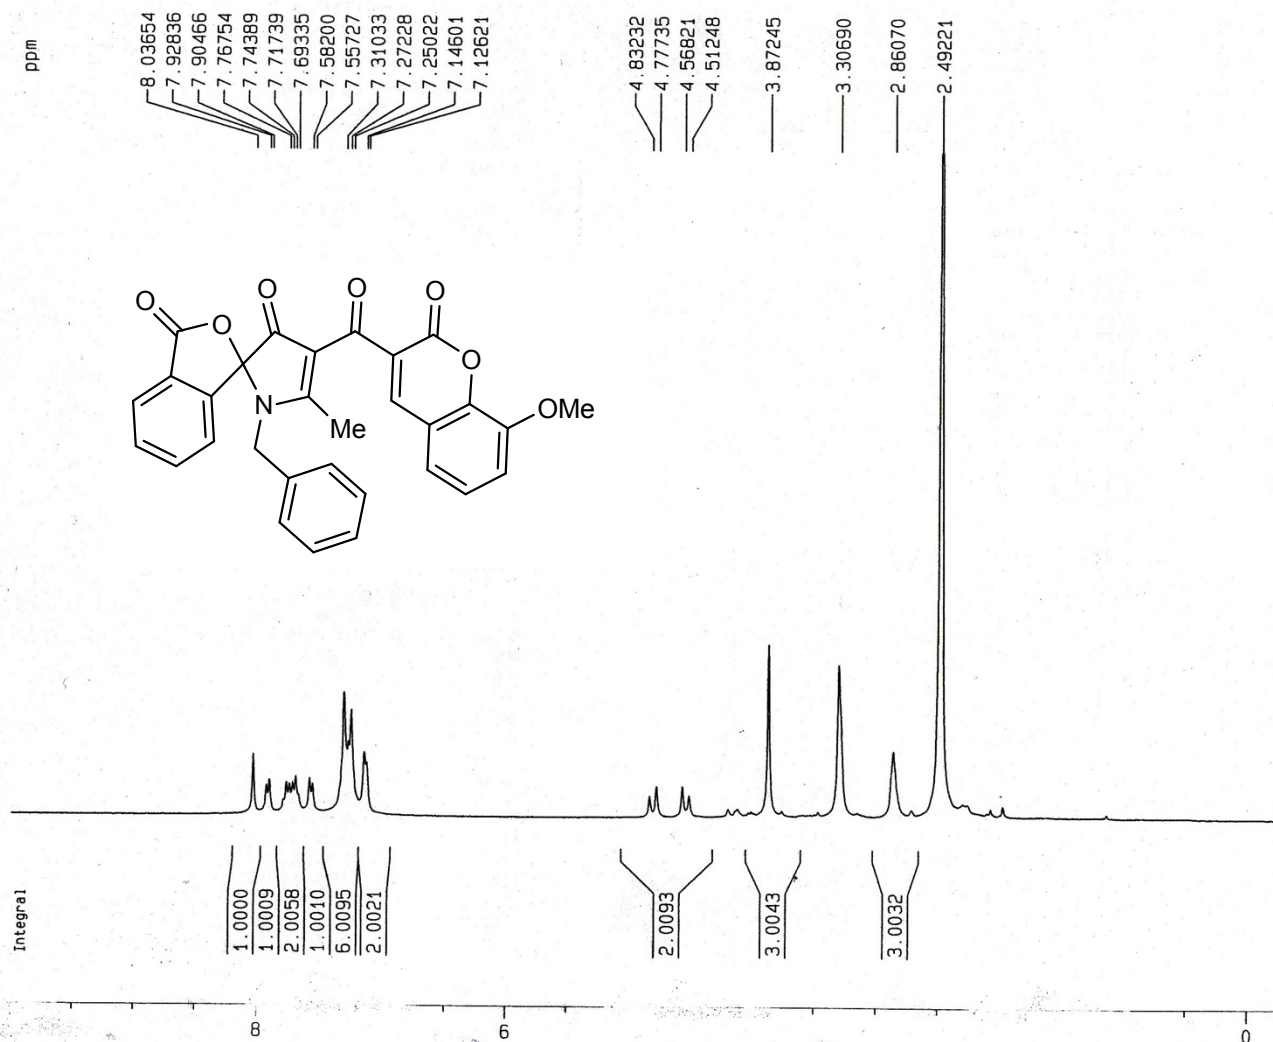

# Current Data Parameters

NAME modarres  
EXPNO 1666  
PROCNO 1

## F2 - Acquisition Parameters

Date\_ 20141222  
Time 19.31  
INSTRUM spect  
PROBHD 5 mm Multinucl  
PULPROG zg  
TD 32768  
SOLVENT DMSO  
NS 8  
DS 2  
SWH 6172.839 Hz  
FIDRES 0.188380 Hz  
AQ 2.6542580 sec  
RG 256  
DW 81.000 usec  
DE 6.00 usec  
TE 300.0 K  
D1 6.00000000 sec

## ===== CHANNEL f1 =====

NUC1 1H  
P1 10.00 usec  
PL1 0.00 dB  
SF01 300.1315007 MHz

## F2 - Processing parameters

SI 32768  
SF 300.1300034 MHz  
WDW EM  
SSB 0  
LB 0.30 Hz  
GB 0  
PC 1.00

## 1D NMR plot parameters

CX 20.00 cm  
CY 12.50 cm  
F1P 10.000 ppm  
F1 3001.30 Hz  
F2P -0.300 ppm  
F2 -90.04 Hz  
PPMCM 0.51500 ppm/cm  
HZCM 154.56694 Hz/cm

<sup>1</sup>H NMR of 7f

S35

MF.47 Ms.Feizabadi

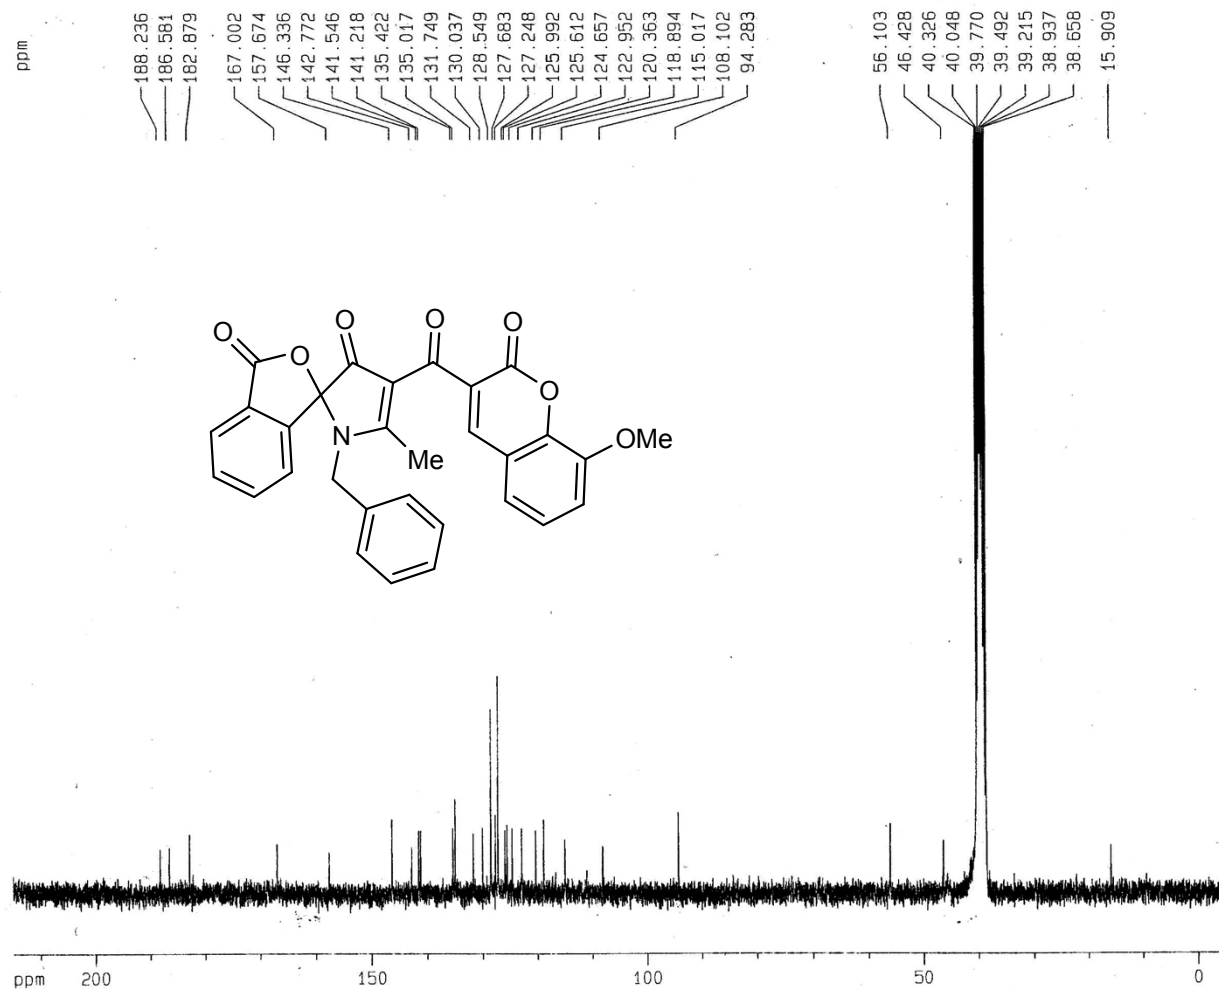

Current Data Parameters  
NAME modarres  
EXPNO 1669  
PROCNO 1

F2 - Acquisition Parameters  
Date\_ 20141225  
Time 18.10  
INSTRUM spect  
PROBHD 5 mm Multinucl  
PULPROG zgpg30  
TD 32768  
SOLVENT DMSO  
NS 10240  
DS 0  
SWH 17985.611 Hz  
FIDRES 0.548877 Hz  
AQ 0.9110004 sec  
RG 14596.5  
DW 27.800 usec  
DE 6.00 usec  
TE 300.0 K  
D1 2.00000000 sec  
d11 0.03000000 sec  
d12 0.00002000 sec

===== CHANNEL f1 =====  
NUC1 13C  
P1 7.00 usec  
PL1 -4.00 dB  
SFO1 75.4752953 MHz

===== CHANNEL f2 =====  
CPDPRG2 waltz16  
NUC2 1H  
PCPD2 80.00 usec  
PL2 0.00 dB  
PL12 21.00 dB  
PL13 21.00 dB  
SFO2 300.1312005 MHz

F2 - Processing parameters  
S1 65536  
SF 75.4677861 MHz  
WDW EM  
SSB 0  
LB 1.00 Hz  
GB 0  
PC 1.40

1D NMR plot parameters  
CX 20.00 cm  
CY 120.00 cm  
F1P 215.000 ppm  
F1 16225.57 Hz  
F2P -5.000 ppm  
F2 -377.34 Hz  
PPMCM 11.00000 ppm/cm  
HZCM 830.14563 Hz/cm

<sup>13</sup>C NMR of 7f

S36

ORTEP diagram for 3a

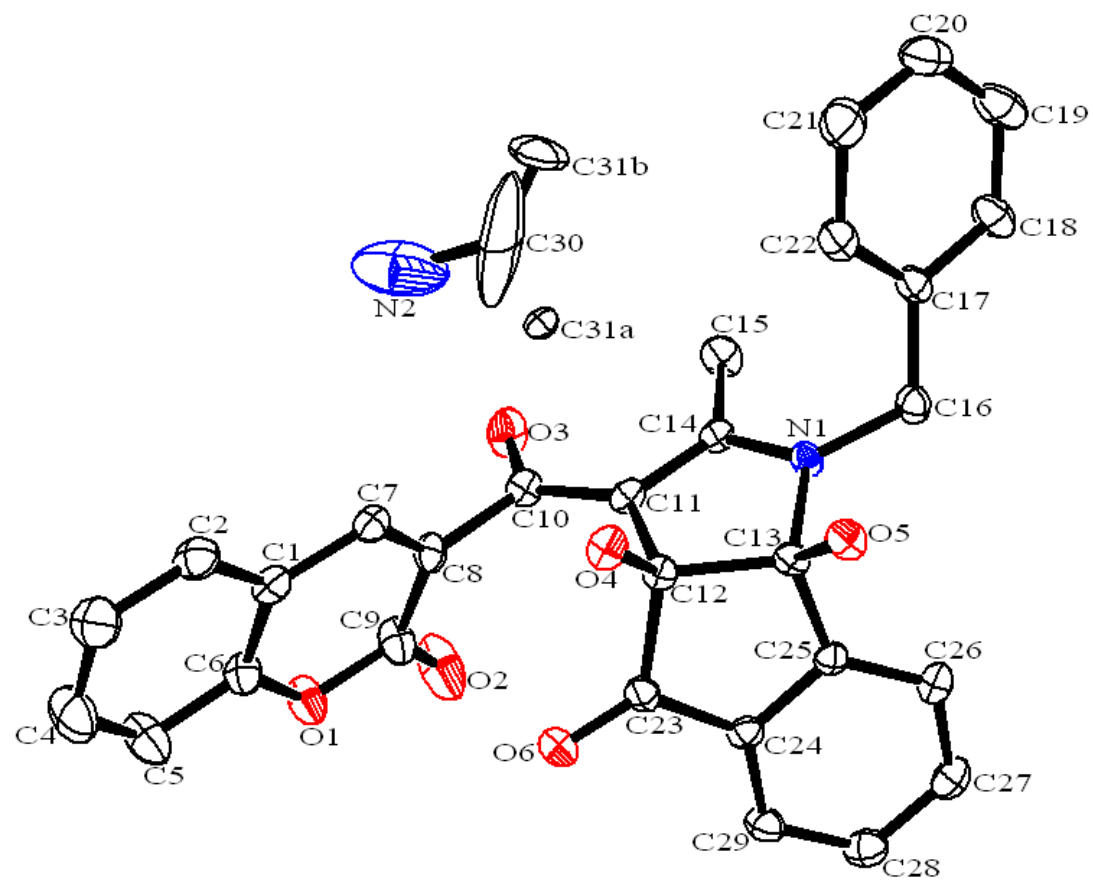

ORTEP diagram for 7a

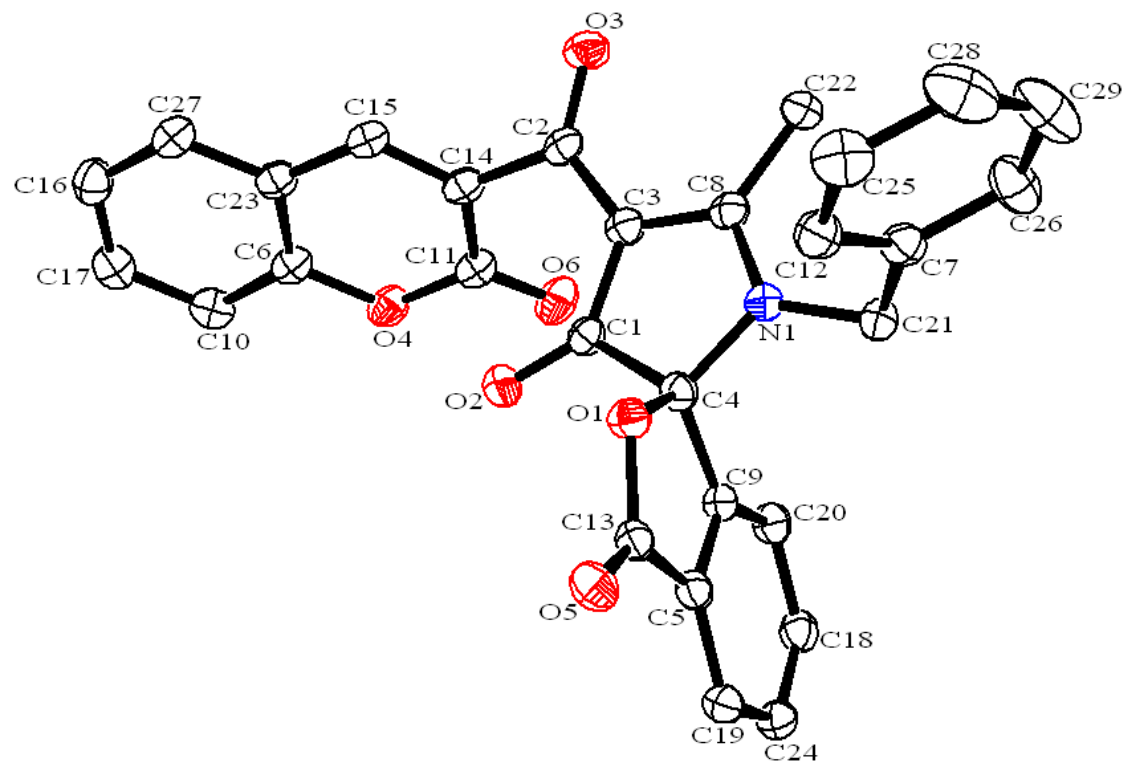

Supplement: c5ra15405g1.pdf [file c5ra15405g1.pdf]
